# Supplementary material for: Unlocking Potentially Therapeutic Phytochemicals in Capadulla (Doliocarpus dentatus) from Guyana Using Untargeted Mass Spectrometry-Based Metabolomics
Source: MDPI journal article supplement (doi:10.3390/metabo13101050), 2023-10-03
Supplement: s1 [file s1]

## Supplemental Information

### **Unlocking potentially therapeutic phytochemicals in *Capadulla (Doliocarpus dentatus)* from Guyana using untargeted mass spectrometry-based metabolomics**

Ewart Smith<sup>a</sup>, Ainsely Lewis<sup>b</sup>, RJ Neil Emery<sup>b</sup>, and Suresh S Narine<sup>c</sup>

<sup>a</sup>Environmental and Life Sciences Graduate Program, Trent University, Peterborough, ON, Canada

<sup>b</sup>Department of Biology, Trent University, Peterborough, ON, Canada

<sup>c</sup>Trent Centre for Biomaterials Research, Trent University, Peterborough, ON, Canada

Corresponding Authors: [ewartsmith@trentu.ca](mailto:ewartsmith@trentu.ca) , [ainselylewis@trentu.ca](mailto:ainselylewis@trentu.ca)

## 1. Method

### 1.1 XCMS Online Settings for data alignment and annotation

XCMS Online default values were used for analysis. Briefly, pairwise comparisons were used with UPLC/Orbitrap parameter 3110. For feature detection, the centWave option was used with 5 ppm error, and a minimum and maximum peak width of 5 and 20 respectively. The minimum m/z difference (mzdiff) was 0.01 with a signal/noise threshold of 4, and 1 was used for the integration method. For retention time correction, the Obiwrap method was used. For alignment, the m/z width used (mzwid) was 0.025, with a bandwidth (bw) of 5, and a minimum fraction of samples (minfrac) of 0.5. the minimum number of samples (minsamp) was 1 with a maximum number of groups of 100.

For statistical analyses, the unpaired parametric t test (Welch t test) was used with a p-value threshold of 0.01 for highly significant features, and a foldchange threshold of 1.5. p-value threshold of significant features was 0.05. For annotation, both isotopes and adducts were searched for at a 5 ppm error with an m/z absolute error of 0.015.

### 1.2 Using SIRIUS 5.8.3 for metabolite annotation

#### 1.2.1 Positive ionization mode settings

```
config --IsotopeSettings.filter=true --
FormulaSearchDB=BIO,METACYC,CHEBI,COCONUT,ECOCYCMINE,GNPS,HMDB,HSDB,KEGG,KEGGMINE,K
NAPSACK,MACONDA,MESH,NORMAN,UNDP,PLANTCYC,PUBCHEM,PUBMED,YMDB,YMDBMINE,ZINCBIO
--Timeout.secondsPerTree=0 --FormulaSettings.enforced=HCNOP --Timeout.secondsPerInstance=0 --
AdductSettings.detectable=[[M+H]+,[M+H3N+H]+,[M-H4O2+H]+,[M-H2O+H]+] --
UseHeuristic.mzToUseHeuristicOnly=650 --AlgorithmProfile=orbitrap --IsotopeMs2Settings=IGNORE --
MS2MassDeviation.allowedMassDeviation=10.0ppm --NumberOfCandidatesPerIon=1 --
UseHeuristic.mzToUseHeuristic=300 --FormulaSettings.detectable=Cl,S --NumberOfCandidates=10 --
ZodiacNumberOfConsideredCandidatesAt300Mz=10 --ZodiacRunInTwoSteps=true --
ZodiacEdgeFilterThresholds.minLocalConnections=10 --ZodiacEdgeFilterThresholds.thresholdFilter=0.95 --
ZodiacEpochs.burnInPeriod=2000 --ZodiacEpochs.numberOfMarkovChains=10 --
ZodiacNumberOfConsideredCandidatesAt800Mz=50 --ZodiacEpochs.iterations=20000 --AdductSettings.enforced=, --
AdductSettings.fallback=[[M+H]+,[M-H2O+H]+] --FormulaResultThreshold=true --InjectElGordoCompounds=true --
StructureSearchDB=BIO,METACYC,CHEBI,COCONUT,ECOCYCMINE,GNPS,HMDB,HSDB,KEGG,KEGGMINE,K
NAPSACK,MACONDA,MESH,NORMAN,UNDP,PLANTCYC,PUBCHEM,PUBMED,YMDB,YMDBMINE,ZINCBIO
--RecomputeResults=false formula zodiac fingerprint structure canopus
```

#### 1.2.2 Negative ionization mode settings

```
config --IsotopeSettings.filter=true --
FormulaSearchDB=BIO,METACYC,CHEBI,COCONUT,ECOCYCMINE,GNPS,HMDB,HSDB,KEGG,KEGGMINE,K
NAPSACK,MACONDA,MESH,NORMAN,UNDP,PLANTCYC,PUBCHEM,PUBMED,YMDB,YMDBMINE,ZINCBIO
--Timeout.secondsPerTree=0 --FormulaSettings.enforced=HCNOP --Timeout.secondsPerInstance=0 --
AdductSettings.detectable=[[M-H]-,[M-H2O-H]-] --UseHeuristic.mzToUseHeuristicOnly=650 --
AlgorithmProfile=orbitrap --IsotopeMs2Settings=IGNORE --MS2MassDeviation.allowedMassDeviation=10.0ppm --
NumberOfCandidatesPerIon=1 --UseHeuristic.mzToUseHeuristic=300 --FormulaSettings.detectable=B,Cl,Br,Se,S --
NumberOfCandidates=10 --ZodiacNumberOfConsideredCandidatesAt300Mz=10 --ZodiacRunInTwoSteps=true --
ZodiacEdgeFilterThresholds.minLocalConnections=10 --ZodiacEdgeFilterThresholds.thresholdFilter=0.95 --
ZodiacEpochs.burnInPeriod=2000 --ZodiacEpochs.numberOfMarkovChains=10 --
ZodiacNumberOfConsideredCandidatesAt800Mz=50 --ZodiacEpochs.iterations=20000 --AdductSettings.enforced=, --
AdductSettings.fallback=[[M-H]-,[M-H2O-H]-] --FormulaResultThreshold=true --InjectElGordoCompounds=true --
StructureSearchDB=BIO,METACYC,CHEBI,COCONUT,ECOCYCMINE,GNPS,HMDB,HSDB,KEGG,KEGGMINE,K
```

NAPSACK,MACONDA,MESH,NORMAN,UNDP,PLANTCYC,PUBCHEM,PUBMED,YMDB,YMDBMINE,ZINCBIO  
--RecomputeResults=false formula zodiac fingerprint structure canopus

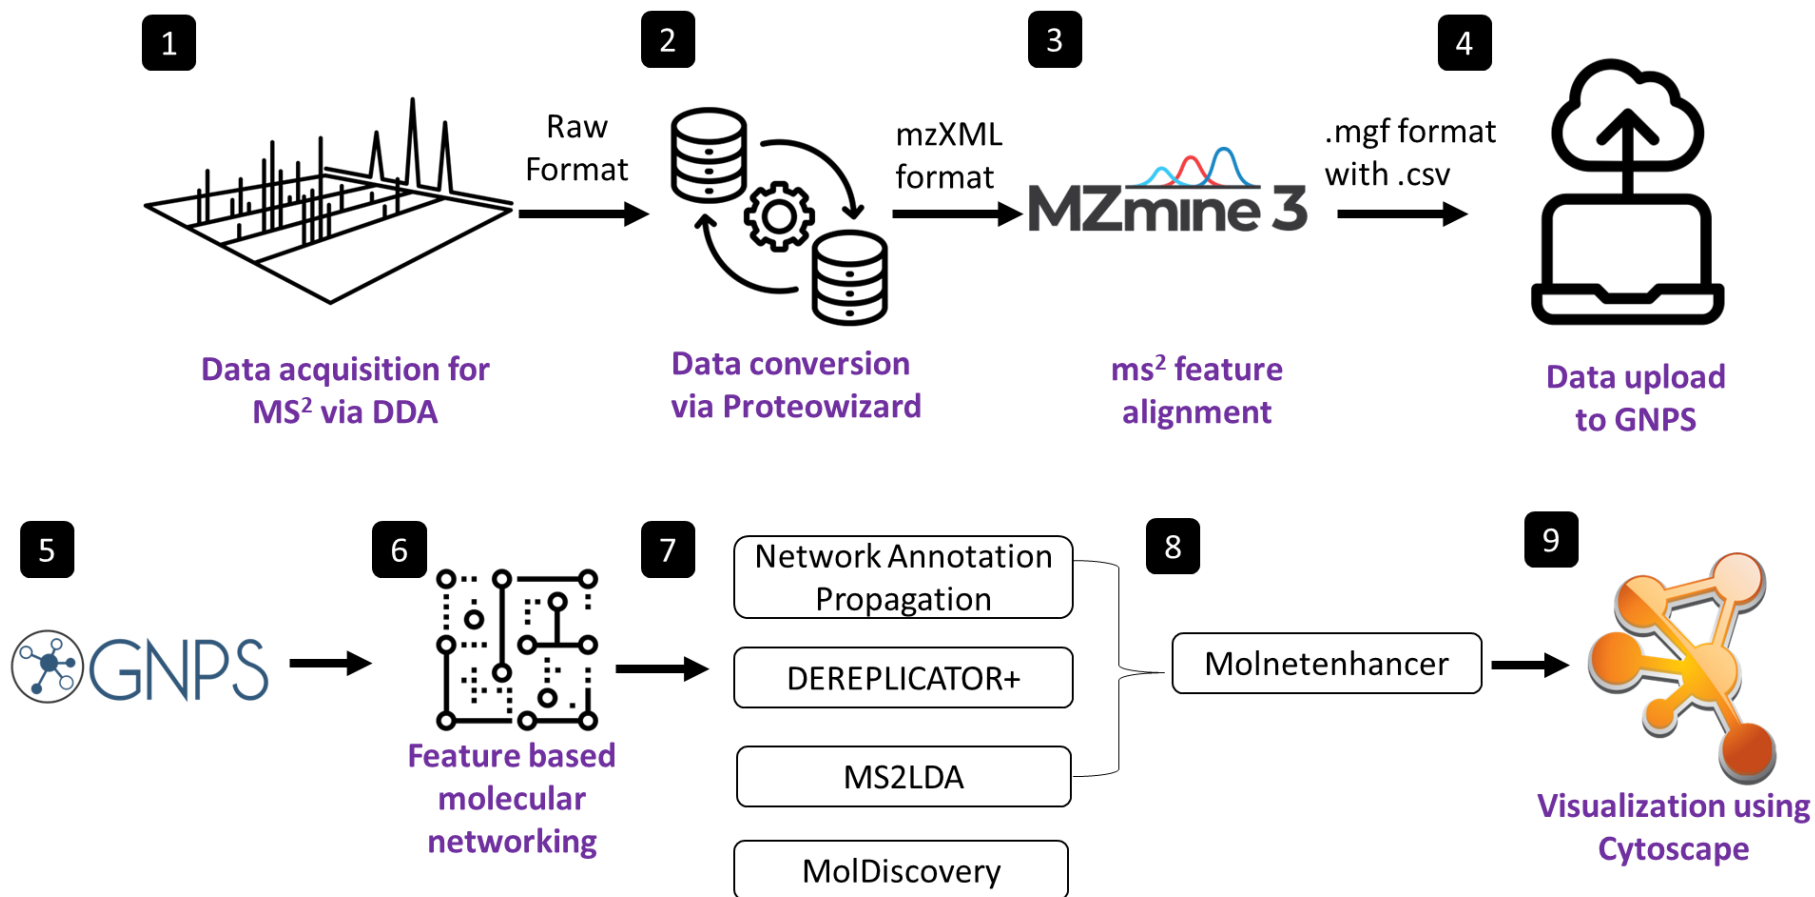

Figure S1: (A) Workflow of tandem mass spectrometry processing for preparation using feature based molecular networking via GNPS.

**Supplemental Table S1:** Tentative metabolite identification of compounds that are biofingerprints of interests found in both *D. dentatus* red and white ecotypes. SIRIUS was used as an in silico fragmentation tool for metabolite annotation. Tentative identification of compounds with fragments are at level 3 using SIRIUS, otherwise at level 4 metabolite annotation.

| Tentative Identification              | Molecular formula                                             | Adduct | Exact mass | Theoretical mass | Experimental mass | Mass error (ppm) | t <sub>R</sub> (min) | MS <sup>2</sup>             | Annotation Level |
|---------------------------------------|---------------------------------------------------------------|--------|------------|------------------|-------------------|------------------|----------------------|-----------------------------|------------------|
| Resveratrol                           | C <sub>14</sub> H <sub>12</sub> O <sub>3</sub>                | M+H    | 228.0786   | 228.0786         | 228.0773          | 5.89             | 4.0                  | -                           | 4                |
| Quercetin                             | C <sub>15</sub> H <sub>10</sub> O <sub>7</sub>                | M-H    | 302.0427   | 301.0354         | 301.0356          | -0.74            | 4.0                  | 215.0697,149.0241,243.0668  | 3                |
| Epicatechin 3-O-(3'-O-Methyl gallate) | C <sub>23</sub> H <sub>20</sub> O <sub>10</sub>               | M+H    | 456.1056   | 457.1129         | 457.1115          | 3.06             | 4.6                  | 167.0346,139.0398,123.0440  | 3                |
| (+)-Catechin                          | C <sub>15</sub> H <sub>14</sub> O <sub>6</sub>                | M+H    | 290.079    | 291.0863         | 291.0851          | 4.17             | 4.4                  | 245.0823,203.0717,109.0292  | 2                |
| Apigenin                              | C <sub>15</sub> H <sub>10</sub> O <sub>5</sub>                | M+H    | 270.0528   | 271.0601         | 271.0591          | 3.69             |                      | 215.0698,194.0242,243.0668  | 3                |
| Proanthocyanidin B2                   | C <sub>30</sub> H <sub>26</sub> O <sub>12</sub>               | M+H    | 578.1424   | 579.1497         | 579.1476          | 3.63             | 4.5                  | 127.0387, 163.0395,247.0615 | 3                |
| Leucocyanidin                         | C <sub>15</sub> H <sub>14</sub> O <sub>7</sub>                | M+H    | 306.074    | 307.0812         | 307.0801          | 3.68             | 4.1                  | -                           | 4                |
| Luteolin                              | C <sub>15</sub> H <sub>10</sub> O <sub>6</sub>                | M+H    | 286.0477   | 287.0550         | 287.0541          | 3.19             | 4.9                  | 295.0606,167.0695,153.0191  | 3                |
| Naringenin                            | C <sub>15</sub> H <sub>12</sub> O <sub>5</sub>                | M+H    | 272.0685   | 273.0758         | 273.0746          | 4.21             | 5.0                  |                             | 4                |
| Anthocyanidin 3-O-beta-D-sambubioside | C <sub>26</sub> H <sub>29</sub> O <sub>15</sub>               | M+H    | 581.1506   | 582.1579         | 582.1564          | 2.61             | 4.1                  | -                           | 4                |
| Catechin 3-O-Beta-D-Glucopyranoside   | C <sub>21</sub> H <sub>24</sub> O <sub>11</sub>               | M+H    | 452.1319   | 453.1391         | 453.1371          | 4.41             | 4.1                  | 289.0710,245.0823,271.0621  | 4                |
| Taxifolin                             | C <sub>15</sub> H <sub>12</sub> O <sub>7</sub>                | M+H    | 304.0583   | 305.0656         | 305.0645          | 3.54             | 4.3                  | 217.0486, 201.0564,187.0764 | 3                |
| Quercetin 3-glucoside                 | C <sub>21</sub> H <sub>20</sub> O <sub>12</sub>               | M+H    | 464.0955   | 465.1028         | 465.102           | 1.62             | 4                    | -                           | 4                |
| Lyonside                              | C <sub>27</sub> H <sub>36</sub> O <sub>12</sub>               | M+H    | 552.2207   | 551.2134         | 551.2095          | 7.07             | 4.3                  | -                           | 4                |
| Proanthocyanidin A2                   | C <sub>30</sub> H <sub>24</sub> O <sub>12</sub>               | M+H    | 578.1424   | 579.1497         | 579.1476          | 3.63             | 4.2                  | 245.0449,287.0565,275.0569  | 3                |
| Chelidonine                           | C <sub>20</sub> H <sub>19</sub> NO <sub>5</sub>               | M+H    | 353.1263   | 354.1336         | 354.1349          | -3.67            | 5.5                  | -                           | 4                |
| Trigonelline                          | C <sub>7</sub> H <sub>7</sub> NO <sub>2</sub>                 | M+H    | 137.0477   | 138.0550         | 138.0544          | 4.02             | 0.8                  | -                           | 4                |
| Kyanmethin                            | C <sub>6</sub> H <sub>9</sub> N <sub>3</sub>                  | M+H    | 123.0796   | 124.0869         | 124.0865          | 3.22             | 7.1                  | 107.0606,810703,79.0545     | 3                |
| 4-Methylpelletierine                  | C <sub>10</sub> H <sub>13</sub> NO <sub>4</sub>               | M+H    | 211.0845   | 212.0917         | 212.0908          | 4.24             | 7.1                  | 194.0811,166.0866,109.0287  | 3                |
| Salsolinol                            | C <sub>9</sub> H <sub>11</sub> NO <sub>2</sub>                | M+H    | 165.0790   | 166.0863         | 166.0857          | 3.34             | 3.9                  | 178.0498,132.0448,105.0338  | 3                |
| Nicotinamide                          | C <sub>6</sub> H <sub>6</sub> N <sub>2</sub> O                | M+H    | 122.0480   | 123.0553         | 123.0548          | 3.98             | 0.7                  | 163.0753,145.0652,117.0702  | 3                |
| Kynurenate                            | C <sub>10</sub> H <sub>7</sub> NO <sub>3</sub>                | M+H    | 189.0426   | 190.0499         | 190.0491          | 4.21             | 4.1                  | 162.0549,144.0438,116.0499  | 3                |
| Raphanatin                            | C <sub>16</sub> H <sub>23</sub> N <sub>5</sub> O <sub>6</sub> | M+H    | 381.1648   | 382.1721         | 382.1704          | 4.47             | 3.8                  | 139.0627,202.1009,145.0509  | 3                |
| Perillic acid                         | C <sub>10</sub> H <sub>14</sub> O <sub>2</sub>                | M+H    | 166.0994   | 167.1067         | 167.1063          | 2.13             | 4.6                  | 214.1010,187.1130,149.0605  | 3                |

|                                                           |                                                 |      |          |          |          |      |     |                              |   |
|-----------------------------------------------------------|-------------------------------------------------|------|----------|----------|----------|------|-----|------------------------------|---|
| (+)-Pulegone                                              | C <sub>10</sub> H <sub>16</sub> O               | M+H  | 152.1201 | 153.1274 | 153.1270 | 2.61 | 3.7 | 107.0857,97.0650,95.0860     | 3 |
| Xerantholide                                              | C <sub>15</sub> H <sub>18</sub> O <sub>3</sub>  | M+H  | 246.1256 | 247.1329 | 247.1322 | 2.83 | 4.7 | 214.1010,187.1130,149.0605   | 3 |
| Kaurane -17,18-dioic acid                                 | C <sub>20</sub> H <sub>30</sub> O <sub>4</sub>  | M+H  | 334.2144 | 335.2217 | 335.2204 | 3.89 | 4.6 | 153.0189, 171.0295, 139.0397 | 3 |
| Betulonic Acid                                            | C <sub>30</sub> H <sub>46</sub> O <sub>3</sub>  | M+H  | 454.3447 | 455.3520 | 455.3502 | 3.89 | 7   | 137.1332,95.0861,203.1792    | 3 |
| Lupenone                                                  | C <sub>30</sub> H <sub>48</sub> O               | M-H  | 424.3705 | 425.3778 | 425.3762 | 3.74 | 6.9 | 95.0860,81.0700,137.1332     | 3 |
| Geniposidic acid                                          | C <sub>16</sub> H <sub>22</sub> O <sub>10</sub> | M-H  | 374.1213 | 373.1140 | 373.1115 | 6.70 | 3.7 | 193.0504,343.1048,181.0498   | 3 |
| Buddlejoside B                                            | C <sub>22</sub> H <sub>26</sub> O <sub>12</sub> | M-H  | 482.1424 | 481.1351 | 481.1312 | 8.21 | 4.2 | 169.0138,3130573,151.0042    | 3 |
| Diospyric Acid B                                          | C <sub>30</sub> H <sub>46</sub> O <sub>6</sub>  | M-H  | 502.3294 | 501.3222 | 501.3203 | 3.72 | 5.1 | 439.3207,457.3303,469.3316   | 3 |
| Glucosol                                                  | C <sub>30</sub> H <sub>48</sub> O <sub>4</sub>  | M-H  | 472.3553 | 471.3480 | 471.3461 | 4.00 | 5.9 | 427.3587,469.3331,423.3260   | 3 |
| (-)-Lariciresinol                                         | C <sub>20</sub> H <sub>24</sub> O <sub>6</sub>  | M+H  | 360.1573 | 361.1646 | 361.1642 | 1.01 | 4.4 | -                            | 4 |
| (-)-Pinoresinol                                           | C <sub>20</sub> H <sub>22</sub> O <sub>6</sub>  | M+H  | 358.1416 | 359.1489 | 359.1475 | 3.94 | 4.7 | -                            | 4 |
| Palmatoside G                                             | C <sub>25</sub> H <sub>32</sub> O <sub>10</sub> | M+H  | 492.1995 | 493.2068 | 493.2043 | 5.12 | 4   | -                            | 4 |
| Gallate                                                   | C <sub>7</sub> H <sub>6</sub> O <sub>5</sub>    | M-H  | 170.0215 | 169.0142 | 169.0134 | 5.01 | 0.5 | 125.0245,97.0290,79.0186     | 3 |
| 2-hydroxy-5-[(3,4,5-trihydroxyoxan-2-yl) oxy]benzoic acid | C <sub>12</sub> H <sub>14</sub> O <sub>8</sub>  | M-H  | 286.0689 | 285.0616 | 285.0599 | 5.96 | 3.9 | 152.0106,108.0213,109.0291   | 3 |
| Lyoniside                                                 | C <sub>27</sub> H <sub>36</sub> O <sub>12</sub> | M-H- | 552.2207 | 551.2134 | 551.2095 | 7.07 | 4.3 | 373.1282,404.1492,59.0137    | 3 |
| Gentisic acid                                             | C <sub>7</sub> H <sub>6</sub> O <sub>4</sub>    | M-H- | 154.0266 | 153.0193 | 153.0183 | 6.74 | 3   | 109.0292,110.0010,137.9956   | 3 |

**Supplemental Table S2:** Tentative metabolite identification of compounds that are biofingerprints of interests unique to *D. dentatus* red ecotype. SIRIUS was used as an in silico fragmentation tool for metabolite annotation. Tentative identification of compounds with fragments are at level 3 using SIRIUS, otherwise at level 4 metabolite annotation.

| Tentative Identification              | Molecular formula                                             | Ionization Mode | Exact mass | Theoretical mass | Experimental mass | Mass error (ppm) | t <sub>R</sub> (min) | MS <sup>2</sup>            | Annotation Level |
|---------------------------------------|---------------------------------------------------------------|-----------------|------------|------------------|-------------------|------------------|----------------------|----------------------------|------------------|
| (-)-Epigallocatechin                  | C <sub>15</sub> H <sub>14</sub> O <sub>7</sub>                | M+H             | 306.0740   | 307.0812         | 307.0812          | 4.33             | 4.2                  | -                          | 4                |
| (+)-alpha-Barbatene                   | C <sub>15</sub> H <sub>24</sub>                               | M+H             | 204.1878   | 205.1951         | 205.1943          | 3.79             | 5.2                  | -                          | 4                |
| (+)-Pulegone                          | C <sub>10</sub> H <sub>16</sub> O                             | M+H             | 152.1201   | 153.1274         | 153.1270          | 2.61             | 3.7                  | 107.0857,97.0650,95.0860   | 3                |
| 3-alpha(S)-Strictosidine              | C <sub>27</sub> H <sub>34</sub> N <sub>2</sub> O <sub>9</sub> | M+H             | 530.2264   | 531.2337         | 531.2332          | 0.95             | 6                    | -                          | 4                |
| Afzelin                               | C <sub>21</sub> H <sub>20</sub> O <sub>10</sub>               | M+H             | 432.1056   | 433.1129         | 433.1117          | 2.82             | 4.5                  | -                          | 4                |
| alpha-Amyrin                          | C <sub>30</sub> H <sub>50</sub> O                             | M+H             | 426.3862   | 427.3934         | 427.3923          | 2.67             | 6.5                  | -                          | 4                |
| Anthocyanidin 3-O-beta-D-sambubioside | C <sub>26</sub> H <sub>29</sub> O <sub>15</sub>               | M+H             | 581.1506   | 582.1579         | 582.1564          | 2.61             | 4.1                  | -                          | 4                |
| Cyanidin 3-O-beta-D-sambubioside      | C <sub>27</sub> H <sub>31</sub> O <sub>14</sub> <sup>+</sup>  | M+H             | 579.1700   | 580.1787         | 580.1841          | -9.38            | 4.6                  | -                          | 4                |
| Coniferyl Alcohol                     | C <sub>10</sub> H <sub>12</sub> O <sub>3</sub>                | M+H             | 180.0786   | 181.0859         | 181.0853          | 3.43             | 5.1                  | -                          | 4                |
| Gibberellin A <sub>1</sub>            | C <sub>19</sub> H <sub>24</sub> O <sub>6</sub>                | M+H             | 348.1573   | 349.1646         | 349.1671          | -7.26            | 4.0                  | -                          | 4                |
| Gibberellin A <sub>19</sub>           | C <sub>20</sub> H <sub>26</sub> O <sub>6</sub>                | M+H             | 362.1729   | 363.1802         | 363.1788          | 3.90             | 5.0                  | -                          | 4                |
| Katuranin                             | C <sub>15</sub> H <sub>12</sub> O <sub>6</sub>                | M+H             | 288.0634   | 287.0561         | 287.0541          | 7.00             | 4.3                  | 215.0697,149.0241,243.0668 | 3                |
| Leucocyanidin                         | C <sub>15</sub> H <sub>14</sub> O <sub>7</sub>                | M+H             | 306.074    | 307.0812         | 307.0801          | 3.68             | 4.1                  | -                          | 4                |
| Luteolin                              | C <sub>15</sub> H <sub>10</sub> O <sub>6</sub>                | M+H             | 286.0477   | 287.0550         | 287.0541          | 3.19             | 4.9                  | -                          | 4                |
| Naringenin                            | C <sub>15</sub> H <sub>12</sub> O <sub>5</sub>                | M+H             | 272.0685   | 273.0758         | 273.0746          | 4.21             | 5.0                  | -                          | 4                |
| Pheophorbide a                        | C <sub>35</sub> H <sub>36</sub> N <sub>4</sub> O <sub>5</sub> | M+H             | 592.2686   | 593.2758         | 593.2781          | -3.80            | 5.1                  | -                          | 4                |
| Quercitrin                            | C <sub>21</sub> H <sub>20</sub> O <sub>11</sub>               | M+H             | 448.1006   | 449.1078         | 449.1069          | 2.00             | 4.5                  | 278.0559,61.0287,71.0494   | 3                |

**Supplemental Table S3:** Tentative metabolite identification of compounds that are biofingerprints of interests unique to *D. dentatus* white ecotype. SIRIUS was used as an in silico fragmentation tool for metabolite annotation. Tentative identification of compounds with fragments are at level 3 using SIRIUS, otherwise at level 4 metabolite annotation.

| Tentative Identification                | Molecular formula                              | Ionization Mode | Exact mass | Theoretical mass | Experimental mass | Mass error (ppm) | t <sub>R</sub> (min) | MS <sup>2</sup>            | Annotation Level |
|-----------------------------------------|------------------------------------------------|-----------------|------------|------------------|-------------------|------------------|----------------------|----------------------------|------------------|
| Nicotinic acid                          | C <sub>6</sub> H <sub>6</sub> N <sub>2</sub> O | M+H             | 122.0480   | 123.0553         | 123.0548          | 3.98             | 4.7                  | -                          | 4                |
| Perillyl aldehyde                       | C <sub>10</sub> H <sub>14</sub> O              | M+H             | 150.1045   | 151.1117         | 151.1113          | 2.92             | 4.1                  | -                          | 4                |
| 5-Hydroxyindoleacetaldehyde             | C <sub>10</sub> H <sub>9</sub> NO <sub>2</sub> | M+H             | 175.0633   | 176.0706         | 176.0702          | 2.30             | 4.5                  | -                          | 4                |
| ent-Kaurene                             | C <sub>20</sub> H <sub>32</sub>                | M+H             | 272.2504   | 273.2577         | 273.2567          | 3.58             | 6                    | -                          | 4                |
| Myricetin                               | C <sub>15</sub> H <sub>10</sub> O <sub>8</sub> | M+H             | 318.0376   | 319.0448         | 319.0442          | 2.02             | 4.1                  | -                          | 4                |
| Gibberellin A <sub>51</sub> -catabolite | C <sub>19</sub> H <sub>22</sub> O <sub>5</sub> | M+H             | 330.1467   | 331.1540         | 331.1534          | 1.81             | 4.5                  | -                          | 4                |
| L-Dopa                                  | C <sub>9</sub> H <sub>11</sub> NO <sub>4</sub> | M+H             | 197.0688   | 198.0761         | 198.0754          | 3.46             | 3.8                  | -                          | 4                |
| Gibberellin A <sub>20</sub>             | C <sub>19</sub> H <sub>24</sub> O <sub>5</sub> | M+H             | 332.1624   | 333.1697         | 333.168           | 4.95             | 5.02                 | -                          | 4                |
| Gibberellin A <sub>4</sub>              | C <sub>20</sub> H <sub>28</sub> O <sub>6</sub> | M+H             | 364.1886   | 364.1886         | 364.1880          | 1.62             | 4.5                  | -                          | 4                |
| Gibberellin A <sub>51</sub>             | C <sub>19</sub> H <sub>22</sub> O <sub>5</sub> | M+H             | 330.1467   | 331.1540         | 331.1534          | 1.81             | 4.5                  | -                          | 4                |
| Quercetin                               | C <sub>15</sub> H <sub>10</sub> O <sub>7</sub> | M-H             | 302.0427   | 301.0354         | 301.0356          | -0.74            | 4.01                 | 163.0396,147.0444,137.0237 | 3                |



**Supplemental Table S4:** Tentative metabolite identification of flavonoid biofingerprints of interests found in *D. dentatus* red and white ecotypes. SIRIUS was used as an in silico fragmentation tool for metabolite annotation. Tentative identification of compounds with fragments are at level 3 using SIRIUS, otherwise at level 4 metabolite annotation.

| Tentative Identification              | Molecular formula                               | Ionization Mode | Exact mass | Theoretical mass | Experimental mass | Mass error (ppm) | t <sub>R</sub> (min) | MS <sup>2</sup>            | Annotation Level |
|---------------------------------------|-------------------------------------------------|-----------------|------------|------------------|-------------------|------------------|----------------------|----------------------------|------------------|
| 5-Hydroxyconiferyl alcohol            | C <sub>10</sub> H <sub>12</sub> O <sub>4</sub>  | M+H             | 196.0736   | 197.081          | 197.0802          | 3.04             | 4.2                  | -                          | 4                |
| Apigenin                              | C <sub>15</sub> H <sub>10</sub> O <sub>5</sub>  | M+H             | 270.0528   | 271.0601         | 271.0591          | 3.69             | 4.5                  | 215.0698,194.0242,243.0668 | 3                |
| Luteolin                              | C <sub>15</sub> H <sub>10</sub> O <sub>6</sub>  | M+H             | 286.0477   | 287.0550         | 287.0541          | 3.19             | 4.9                  | 231.0667,213.0561,153.0191 | 3                |
| Myricetin                             | C <sub>15</sub> H <sub>10</sub> O <sub>8</sub>  | M+H             | 318.0376   | 319.0448         | 319.0442          | 2.02             | 4.1                  | -                          | 4                |
| 3,9-Dihydroxypterocarpan              | C <sub>15</sub> H <sub>12</sub> O <sub>4</sub>  | M+H             | 256.0736   | 257.0808         | 257.0802          | 2.47             | 4.74                 | -                          | 4                |
| (+)-Dalbergioidin                     | C <sub>15</sub> H <sub>12</sub> O <sub>6</sub>  | M+H             | 288.0634   | 289.0707         | 289.0697          | 3.34             | 4.2                  | -                          | 4                |
| Taxifolin                             | C <sub>15</sub> H <sub>12</sub> O <sub>7</sub>  | M+H             | 304.0583   | 305.0656         | 305.0645          | 3.54             | 4.3                  | 217.0486, 01.0564,187.0764 | 3                |
| Dihydromyricetin                      | C <sub>15</sub> H <sub>12</sub> O <sub>8</sub>  | M+H             | 320.0532   | 321.0605         | 321.0593          | 3.72             | 4.1                  | -                          | 4                |
| (+)-Catechin                          | C <sub>15</sub> H <sub>14</sub> O <sub>6</sub>  | M+H             | 290.079    | 291.0863         | 291.0851          | 4.17             | 4.4                  | 139.0398,177.0558,123.0439 | 2                |
| Leucodelphinidin                      | C <sub>15</sub> H <sub>14</sub> O <sub>8</sub>  | M+H             | 322.0689   | 323.0761         | 323.0750          | 3.54             | 4.5                  | -                          | 4                |
| Quercitrin                            | C <sub>21</sub> H <sub>20</sub> O <sub>11</sub> | M+H             | 448.1006   | 449.1078         | 449.1069          | 2.00             | 4.5                  | 278.0559,61.0287,71.0494   | 3                |
| Quercetin 3-glucoside                 | C <sub>21</sub> H <sub>20</sub> O <sub>12</sub> | M+H             | 464.0955   | 465.1028         | 465.102           | 1.62             | 4.4                  | -                          | 4                |
| Cristacarpin                          | C <sub>21</sub> H <sub>22</sub> O <sub>5</sub>  | M+H             | 354.1467   | 355.1540         | 355.1526          | 3.94             | 5.04                 | -                          | 4                |
| Catechin 3-O-Beta-D-Glucopyranoside   | C <sub>21</sub> H <sub>24</sub> O <sub>11</sub> | M+H             | 452.1319   | 453.1391         | 453.1371          | 4.41             | 4.09                 | 139.0399,123.0440,163.0398 | 3                |
| Fisetin                               | C <sub>22</sub> H <sub>16</sub> O <sub>8</sub>  | M+H             | 408.0845   | 409.0918         | 409.0902          | 3.91             | 4.5                  | 257.0437,285.0414,229.0512 | 3                |
| Epicatechin 3-O-(3'-O-Methylgallate)  | C <sub>23</sub> H <sub>20</sub> O <sub>10</sub> | M+H             | 456.1056   | 457.1129         | 457.1115          | 3.06             | 4.6                  | 167.0346,139.0398,123.0440 | 3                |
| Anthocyanidin 3-O-beta-D-sambubioside | C <sub>26</sub> H <sub>29</sub> O <sub>15</sub> | M+H             | 581.1506   | 582.1579         | 582.1564          | 2.61             | 4.1                  | -                          | 4                |
| Proanthocyanidin A2                   | C <sub>30</sub> H <sub>24</sub> O <sub>12</sub> | M+H             | 576.1268   | 577.1341         | 577.1324          | 2.94             | 4.5                  | 245.0449,287.0565,275.0569 | 3                |
| Gambirini C                           | C <sub>30</sub> H <sub>26</sub> O <sub>11</sub> | M+H             | 562.1475   | 563.1548         | 563.1536          | 2.11             | 4.5                  | 139.0399,147.0445,285.0779 | 3                |
| Proanthocyanidin B2                   | C <sub>30</sub> H <sub>26</sub> O <sub>12</sub> | M+H             | 578.1424   | 579.1497         | 579.1476          | 3.63             | 4.2                  | 127.0387, 63.0395,247.0615 | 4                |

|                                  |                                                 |     |          |          |          |       |      |                            |   |
|----------------------------------|-------------------------------------------------|-----|----------|----------|----------|-------|------|----------------------------|---|
| Quercetin                        | C <sub>15</sub> H <sub>10</sub> O <sub>7</sub>  | M-H | 302.0427 | 301.0354 | 301.0356 | -0.74 | 4.06 | 163.0396,147.0444,137.0237 | 3 |
| Katuranin                        | C <sub>15</sub> H <sub>12</sub> O <sub>6</sub>  | M-H | 288.0634 | 287.0561 | 287.0541 | 7.01  | 4.3  | 215.0697,149.0241,243.0668 | 3 |
| Resveratrol                      | C <sub>14</sub> H <sub>12</sub> O <sub>3</sub>  | M+H | 228.0786 | 228.0786 | 228.0773 | 5.89  | 4.7  | -                          | 4 |
| Distylin                         | C <sub>15</sub> H <sub>12</sub> O <sub>7</sub>  | M-H | 304.0583 | 303.0510 | 303.049  | 6.69  | 4.27 | 125.0243,235.0618,258.0396 | 3 |
| (+)-Catechin                     | C <sub>15</sub> H <sub>14</sub> O <sub>6</sub>  | M-H | 290.079  | 289.0718 | 289.0695 | 7.82  | 4.27 | 245.0823,203.0717,109.0292 | 2 |
| Astragalin                       | C <sub>21</sub> H <sub>20</sub> O <sub>11</sub> | M-H | 448.1006 | 447.0933 | 447.0966 | -7.42 | 4.5  | 285.0396,284.0330,257.0467 | 3 |
| Engeletin                        | C <sub>21</sub> H <sub>22</sub> O <sub>10</sub> | M-H | 434.1213 | 433.1140 | 433.1117 | 5.36  | 4.61 | 269.0446,180.0055,152.0107 | 3 |
| Astilbin                         | C <sub>21</sub> H <sub>22</sub> O <sub>11</sub> | M-H | 450.1162 | 449.1089 | 449.1089 | 0.08  | 5    | 241.0503,169.0662,199.0403 | 3 |
| Quercetin 7-(6"-Acetylglucoside) | C <sub>23</sub> H <sub>22</sub> O <sub>13</sub> | M-H | 506.1060 | 505.0988 | 505.0989 | -0.27 | 4.13 | 233.0810,183.0295,215.0709 | 3 |
| Endotelon                        | C <sub>30</sub> H <sub>26</sub> O <sub>12</sub> | M-H | 578.1424 | 577.1351 | 577.1324 | 4.763 | 4.23 | 125.0243,245.0823,283.0235 | 3 |

**Supplemental Table S5:** Tentative metabolite identification of alkaloid biofingerprints of interests found in *D. dentatus* red and white ecotypes. SIRIUS 5.8.3 was used as an in silico fragmentation tool for metabolite annotation. Tentative identification of compounds with fragments are at level 3 using SIRIUS, otherwise at level 4 metabolite annotation.

| Tentative Identification | Molecular formula                                             | Ionization Mode | Exact mass | Theoretical mass | Experimental mass | Mass error (ppm) | t <sub>R</sub> (min) | MS <sup>2</sup>            | Annotation Level |
|--------------------------|---------------------------------------------------------------|-----------------|------------|------------------|-------------------|------------------|----------------------|----------------------------|------------------|
| Tyramine                 | C <sub>8</sub> H <sub>11</sub> NO                             | M+H             | 137.0841   | 138.0913         | 138.0908          | 3.91             | 6.9                  | -                          | 4                |
| Thiazole                 | C <sub>6</sub> H <sub>9</sub> NOS                             | M+H             | 143.0405   | 144.0478         | 144.0473          | 3.20             | 1.6                  | 98.0605,84.0811,84.0446    | 3                |
| Trigonelline             | C <sub>7</sub> H <sub>7</sub> NO <sub>2</sub>                 | M+H             | 137.0477   | 138.0550         | 138.0544          | 4.02             | 0.8                  | -                          | 4                |
| Stachydrine              | C <sub>7</sub> H <sub>13</sub> NO <sub>2</sub>                | M+H             | 143.0946   | 144.1019         | 144.1015          | 2.81             | 0.6                  | -                          | 4                |
| N-Methylpelletierine     | C <sub>9</sub> H <sub>17</sub> NO                             | M+H             | 155.1310   | 156.1383         | 156.1377          | 3.78             | 0.9                  | -                          | 4                |
| 3-Hydroxystachydrine     | C <sub>7</sub> H <sub>13</sub> NO <sub>3</sub>                | M+H             | 159.0895   | 160.0968         | 160.0963          | 3.25             | 0.6                  | -                          | 4                |
| Lemobiline               | C <sub>15</sub> H <sub>17</sub> NO <sub>2</sub>               | M+H             | 243.1259   | 244.1332         | 244.1325          | 2.90             | 4.5                  | -                          | 4                |
| Arborinine               | C <sub>16</sub> H <sub>15</sub> NO <sub>4</sub>               | M+H             | 285.1001   | 286.1074         | 286.1064          | 3.44             | 3.9                  | -                          | 4                |
| Anisodamine              | C <sub>17</sub> H <sub>23</sub> NO <sub>4</sub>               | M+H             | 305.1627   | 306.1700         | 306.1686          | 4.52             | 4                    | -                          | 4                |
| Chelidonine              | C <sub>20</sub> H <sub>19</sub> NO <sub>5</sub>               | M+H             | 353.1263   | 354.1336         | 354.1349          | -3.67            | 5.5                  | -                          | 4                |
| Ancistrosectorine        | C <sub>26</sub> H <sub>31</sub> NO <sub>4</sub>               | M+H             | 421.2253   | 422.2326         | 422.2307          | 4.46             | 6.0                  | -                          | 4                |
| Kyanmethin               | C <sub>6</sub> H <sub>9</sub> N <sub>3</sub>                  | M+H             | 123.0796   | 124.0869         | 124.0865          | 3.22             | 7.1                  | 107.0606,810703,79.0545    | 3                |
| 4-Methylpelletierine     | C <sub>10</sub> H <sub>13</sub> NO <sub>4</sub>               | M+H             | 211.0845   | 212.0917         | 212.0908          | 4.24             | 7.1                  | 194.0811,166.0866,109.0287 | 3                |
| Salsolinol               | C <sub>9</sub> H <sub>11</sub> NO <sub>2</sub>                | M+H             | 165.0790   | 166.0863         | 166.0857          | 3.34             | 3.9                  | 178.0498,132.0448,105.0338 | 3                |
| Nicotinamide             | C <sub>6</sub> H <sub>6</sub> N <sub>2</sub> O                | M+H             | 122.0480   | 123.0553         | 123.0548          | 4.00             | 0.7                  | 163.0753,145.0652,117.0702 | 3                |
| Kynurenate               | C <sub>10</sub> H <sub>7</sub> NO <sub>3</sub>                | M+H             | 189.0426   | 190.0499         | 190.0491          | 4.21             | 4.1                  | 162.0549,144.0438,116.0499 | 3                |
| Raphanatin               | C <sub>16</sub> H <sub>23</sub> N <sub>5</sub> O <sub>6</sub> | M+H             | 381.1648   | 382.1721         | 382.1704          | 4.47             | 3.8                  | 139.0627,202.1009,145.0509 | 3                |
| Deltaline                | C <sub>27</sub> H <sub>41</sub> NO <sub>8</sub>               | M+H             | 507.2832   | 508.2905         | 508.2948          | -8.47            | 6.6                  | -                          | 4                |
| Capnoidine               | C <sub>20</sub> H <sub>17</sub> NO <sub>6</sub>               | M+H             | 367.1056   | 366.0983         | 366.1013          | -8.17            | 4.8                  | -                          | 4                |
| Acetylbrowniine          | C <sub>27</sub> H <sub>43</sub> NO <sub>8</sub>               | M+H             | 509.2989   | 508.2916         | 508.2937          | -4.15            | 5.5                  | -                          | 4                |

**Supplemental Table S6:** Tentative metabolite identification of terpenoid biofingerprints found in *D. dentatus* red and white ecotypes. SIRIUS 5.8.3 was used as an in silico fragmentation tool for metabolite annotation. Tentative identification of compounds with fragments are at level 3 using SIRIUS, otherwise at level 4 metabolite annotation.

| Tentative Identification                                          | Molecular formula                               | Ionization Mode | Exact mass | Theoretical mass | Experimental mass | Mass error (ppm) | t <sub>R</sub> (min) | MS <sup>2</sup>              | Annotation Level |
|-------------------------------------------------------------------|-------------------------------------------------|-----------------|------------|------------------|-------------------|------------------|----------------------|------------------------------|------------------|
| Perillic acid                                                     | C <sub>10</sub> H <sub>14</sub> O <sub>2</sub>  | M+H             | 166.0994   | 167.1067         | 167.1063          | 2.13             | 4.6                  | 121.1011,0.93.0699,107.0859  | 3                |
| (+)-Pulegone                                                      | C <sub>10</sub> H <sub>16</sub> O               | M+H             | 152.1201   | 153.1274         | 153.1270          | 2.61             | 3.7                  | 107.0857,97.0650,95.0860     | 3                |
| Xerantholide                                                      | C <sub>15</sub> H <sub>18</sub> O <sub>3</sub>  | M+H             | 246.1256   | 247.1329         | 247.1322          | 2.83             | 4.7                  | 214.1010,187.1130,149.0605   | 3                |
| Alantolactone                                                     | C <sub>15</sub> H <sub>20</sub> O <sub>2</sub>  | M+H             | 232.1463   | 233.1536         | 233.1530          | 2.60             | 4.9                  | -                            | 4                |
| (+)-Thujopsene                                                    | C <sub>15</sub> H <sub>24</sub>                 | M+H             | 204.1878   | 205.1951         | 205.1943          | 3.79             | 4.9                  | -                            | 4                |
| Deoxyelephantopin                                                 | C <sub>19</sub> H <sub>20</sub> O <sub>6</sub>  | M+H             | 344.1260   | 345.1333         | 345.1319          | 3.95             | 4.7                  | -                            | 4                |
| Deoxymiroestrol                                                   | C <sub>20</sub> H <sub>22</sub> O <sub>5</sub>  | M+H             | 342.1467   | 343.1540         | 343.1526          | 4.08             | 5.1                  | -                            | 4                |
| (-)-Pinoresinol                                                   | C <sub>20</sub> H <sub>22</sub> O <sub>6</sub>  | M+H             | 358.1416   | 359.1489         | 359.1475          | 3.94             | 4.71                 | -                            | 4                |
| Niveusin C                                                        | C <sub>20</sub> H <sub>26</sub> O <sub>7</sub>  | M+H             | 378.1679   | 379.1751         | 379.1778          | -7.04            | 4.09                 | -                            | 4                |
| Gibberellin A12 7-aldehyde                                        | C <sub>20</sub> H <sub>28</sub> O <sub>3</sub>  | M+H             | 316.2038   | 317.2111         | 317.2098          | 4.10             | 5.7                  | -                            | 4                |
| Gibberellin A12                                                   | C <sub>20</sub> H <sub>28</sub> O <sub>4</sub>  | M+H             | 332.1988   | 333.2060         | 333.2047          | 4.01             | 4.8                  | -                            | 4                |
| ent-7- $\alpha$ -Hydroxykaur-16-en-19-oic acid                    | C <sub>20</sub> H <sub>30</sub> O <sub>3</sub>  | M+H             | 318.2195   | 319.2268         | 319.2256          | 3.67             | 5.9                  | -                            | 4                |
| (ent-6 $\alpha$ ,7 $\alpha$ )-6,7-Dihydroxy-16-kauren-19-oic acid | C <sub>20</sub> H <sub>30</sub> O <sub>4</sub>  | M+H             | 334.2144   | 335.2217         | 335.2205          | 3.54             | 4.5                  | -                            | 4                |
| Kaurane -17,18-dioic acid                                         | C <sub>20</sub> H <sub>30</sub> O <sub>4</sub>  | M+H             | 334.2144   | 335.2217         | 335.2204          | 3.88             | 4.6                  | 153.0189, 171.0295, 139.0397 | 3                |
| ent-Kaurene                                                       | C <sub>20</sub> H <sub>32</sub>                 | M+H             | 272.2504   | 273.2577         | 273.2567          | 3.56             | 6                    | -                            | 4                |
| Chromolaenide                                                     | C <sub>22</sub> H <sub>28</sub> O <sub>7</sub>  | M+H             | 404.1835   | 405.1908         | 405.1905          | 0.69             | 4.5                  | -                            | 4                |
| Valtratum                                                         | C <sub>22</sub> H <sub>30</sub> O <sub>8</sub>  | M+H             | 422.1941   | 423.2013         | 423.1974          | 9.32             | 5.4                  | -                            | 4                |
| Palmatoside G                                                     | C <sub>25</sub> H <sub>32</sub> O <sub>10</sub> | M+H             | 492.1995   | 493.2068         | 493.2043          | 5.12             | 4                    | -                            | 4                |
| Archangelolide                                                    | C <sub>29</sub> H <sub>40</sub> O <sub>10</sub> | M+H             | 548.2621   | 549.2694         | 549.2675          | 3.50             | 4.6                  | -                            | 4                |

|                              |                                                 |     |          |          |          |       |      |                            |   |
|------------------------------|-------------------------------------------------|-----|----------|----------|----------|-------|------|----------------------------|---|
|                              |                                                 |     |          |          |          |       |      |                            |   |
| Delta7-Avenasterol           | C <sub>29</sub> H <sub>48</sub> O               | M+H | 412.3705 | 413.3778 | 413.3759 | 4.58  | 4.9  | -                          | 4 |
| Musaroside                   | C <sub>30</sub> H <sub>44</sub> O <sub>10</sub> | M+H | 564.2934 | 565.3007 | 565.2987 | 3.58  | 4.2  | -                          | 4 |
| Propapyriogenin A2           | C <sub>30</sub> H <sub>44</sub> O <sub>5</sub>  | M+H | 484.3189 | 485.3262 | 485.3247 | 2.99  | 5.2  | -                          | 4 |
| Betulonic Acid               | C <sub>30</sub> H <sub>46</sub> O <sub>3</sub>  | M+H | 454.3447 | 455.3520 | 455.3502 | 3.89  | 7    | 137.1332,95.0861,203.1792  | 3 |
| Lupenone                     | C <sub>30</sub> H <sub>48</sub> O               | M+H | 424.3705 | 425.3778 | 425.3762 | 3.74  | 6.9  | 95.0860,81.0700,137.1332   | 3 |
| L-Valine                     | C <sub>5</sub> H <sub>11</sub> NO <sub>2</sub>  | M+H | 117.0790 | 118.0863 | 118.0859 | 3.01  | 0.6  | -                          | 4 |
| Absciscic acid               | C <sub>15</sub> H <sub>20</sub> O <sub>4</sub>  | M-H | 264.1362 | 263.1289 | 263.1268 | 7.91  | 4.7  | -                          | 4 |
| 2-trans,6-trans-Farnesal     | C <sub>15</sub> H <sub>24</sub> O               | M-H | 220.1827 | 219.1754 | 219.1740 | 6.56  | 7.5  | -                          | 4 |
| Geniposidic acid             | C <sub>16</sub> H <sub>22</sub> O <sub>10</sub> | M-H | 374.1213 | 373.1140 | 373.1115 | 6.70  | 3.7  | 193.0504,343.1048,181.0498 | 3 |
| Secologanin                  | C <sub>17</sub> H <sub>24</sub> O <sub>10</sub> | M-H | 388.1369 | 387.1297 | 387.1282 | 3.80  | 4.14 | -                          | 4 |
| Chaparrin                    | C <sub>20</sub> H <sub>28</sub> O <sub>7</sub>  | M-H | 380.1835 | 379.1762 | 379.1755 | 1.92  | 4.9  | -                          | 4 |
| Glucolide B                  | C <sub>21</sub> H <sub>26</sub> O <sub>10</sub> | M-H | 438.1526 | 437.1453 | 437.1433 | 4.62  | 4.2  | -                          | 4 |
| Buddlejoside B               | C <sub>22</sub> H <sub>26</sub> O <sub>12</sub> | M-H | 482.1424 | 481.1351 | 481.1312 | 8.21  | 4.2  | 169.0138,3130573,151.0042  | 3 |
| Daphnetoxin                  | C <sub>27</sub> H <sub>30</sub> O <sub>8</sub>  | M-H | 482.1941 | 481.1868 | 481.1897 | -6.05 | 4.5  | -                          | 4 |
| Smilagenin                   | C <sub>27</sub> H <sub>44</sub> O <sub>3</sub>  | M-H | 416.3290 | 415.3218 | 415.3204 | 3.30  | 6.9  | -                          | 4 |
| Castasterone7-Oxatyphasterol | C <sub>28</sub> H <sub>48</sub> O <sub>5</sub>  | M-H | 464.3502 | 463.3429 | 463.3408 | 4.53  | 6.5  | -                          | 4 |
| Brassinolide                 | C <sub>28</sub> H <sub>48</sub> O <sub>6</sub>  | M-H | 480.3451 | 479.3378 | 479.336  | 3.76  | 6.5  | -                          | 4 |
| Diospyric Acid B             | C <sub>30</sub> H <sub>46</sub> O <sub>6</sub>  | M-H | 502.3294 | 501.3222 | 501.3203 | 3.72  | 5.1  | 439.3207,457.3303,469.3316 | 3 |
| Glucosol                     | C <sub>30</sub> H <sub>48</sub> O <sub>4</sub>  | M-H | 472.3553 | 471.3480 | 471.3461 | 4.00  | 5.9  | 427.3587,469.3331,423.3260 | 3 |

**Supplemental Table S7:** Tentative identification of other compounds outside of alkaloids, terpenoids and flavonoids found in both *D. dentatus* red and white ecotypes. SIRIUS was used as an in silico fragmentation tool for metabolite annotation. Tentative identification of compounds with fragments are at level 3 using SIRIUS, otherwise at level 4 metabolite annotation.

| Tentative Identification    | Molecular formula                                             | Ionization Mode | Exact mass | Theoretical mass | Experimental mass | Mass error (ppm) | t <sub>R</sub> (min) | MS <sup>2</sup>            | Annotation level |
|-----------------------------|---------------------------------------------------------------|-----------------|------------|------------------|-------------------|------------------|----------------------|----------------------------|------------------|
| (-)-Lariciresinol           | C <sub>20</sub> H <sub>24</sub> O <sub>6</sub>                | M+H             | 360.1573   | 361.1646         | 361.1642          | 1.01             | 4.4                  | -                          | 4                |
| Indoleacetic acid           | C <sub>10</sub> H <sub>9</sub> NO <sub>2</sub>                | M+H             | 175.0633   | 176.0706         | 176.0701          | 2.87             | 5.4                  | -                          | 4                |
| Adenosine                   | C <sub>10</sub> H <sub>13</sub> N <sub>5</sub> O <sub>4</sub> | M+H             | 267.0968   | 268.1040         | 268.1029          | 4.22             | 1.7                  | -                          | 4                |
| 1-O-Sinapoyl-beta-D-glucose | C <sub>17</sub> H <sub>22</sub> O <sub>10</sub>               | M+H             | 386.1213   | 387.1286         | 387.1273          | 3.29             | 4.03                 | -                          | 4                |
| Nordihydroguaiaretic acid   | C <sub>18</sub> H <sub>22</sub> O <sub>4</sub>                | M+H             | 302.1518   | 303.1591         | 303.1579          | 3.91             | 5.7                  | -                          | 4                |
| Podophyllotoxone            | C <sub>22</sub> H <sub>20</sub> O <sub>8</sub>                | M+H             | 412.1158   | 413.1231         | 413.1214          | 4.10             | 4.43                 | -                          | 4                |
| Lutein                      | C <sub>40</sub> H <sub>56</sub> O <sub>2</sub>                | M+H             | 568.4280   | 569.4353         | 569.4364          | -1.92            | 4.3                  | -                          | 4                |
| Anthragallol                | C <sub>14</sub> H <sub>8</sub> O <sub>5</sub>                 | M+H             | 256.0372   | 257.0444         | 257.0435          | 3.70             | 4.5                  | -                          | 4                |
| Biflorin                    | C <sub>16</sub> H <sub>18</sub> O <sub>9</sub>                | M+H             | 354.0951   | 355.1024         | 355.1011          | 3.54             | 4.3                  | -                          | 4                |
| Gartanin                    | C <sub>23</sub> H <sub>24</sub> O <sub>6</sub>                | M+H             | 396.1573   | 397.1646         | 397.163           | 3.94             | 5.6                  | -                          | 4                |
| Marchantin A                | C <sub>28</sub> H <sub>24</sub> O <sub>5</sub>                | M+H             | 440.1624   | 441.1697         | 441.1717          | -4.65            | 4.3                  | -                          | 4                |
| Scorzocreticin              | C <sub>16</sub> H <sub>14</sub> O <sub>5</sub>                | M+H             | 286.0841   | 287.0914         | 287.0905          | 3.13             | 4.7                  | 269.0815,257.0826,227.0717 | 3                |
| Caffeate                    | C <sub>9</sub> H <sub>8</sub> O <sub>4</sub>                  | M-H             | 180.0423   | 179.0350         | 179.0343          | 3.81             | 4.3                  | -                          | 4                |
| 1-O-Sinapoyl-beta-D-glucose | C <sub>17</sub> H <sub>22</sub> O <sub>10</sub>               | M-H             | 386.1213   | 385.1140         | 385.1126          | 3.69             | 4.4                  | -                          | 4                |
| 5-Hydroxyconiferaldehyde    | C <sub>10</sub> H <sub>10</sub> O <sub>5</sub>                | M-H             | 210.0528   | 209.0455         | 209.0447          | 4.05             | 4.4                  | -                          | 4                |
| Chlorogenate                | C <sub>16</sub> H <sub>18</sub> O <sub>9</sub>                | M-H             | 354.0951   | 353.0878         | 353.0858          | 5.68             | 4.4                  | -                          | 4                |
| 3-Hydroxypropanoate         | C <sub>3</sub> H <sub>6</sub> O <sub>3</sub>                  | M-H             | 90.0317    | 89.0244          | 89.0241           | 3.56             | 0.6                  | -                          | 4                |
| 2-Oxobutanoate              | C <sub>4</sub> H <sub>6</sub> O <sub>3</sub>                  | M-H             | 102.0317   | 101.0244         | 101.0239          | 5.12             | 0.6                  | -                          | 4                |
| Succinate                   | C <sub>4</sub> H <sub>6</sub> O <sub>4</sub>                  | M-H             | 118.0266   | 117.0193         | 117.0189          | 3.69             | 0.8                  | -                          | 4                |
| cis-Aconitate               | C <sub>6</sub> H <sub>6</sub> O <sub>6</sub>                  | M-H             | 174.0164   | 173.0092         | 173.0083          | 5.0              | 0.6                  | -                          | 4                |

|                                                          |                                                 |     |          |          |          |      |     |                            |   |
|----------------------------------------------------------|-------------------------------------------------|-----|----------|----------|----------|------|-----|----------------------------|---|
| Isocitrate                                               | C <sub>6</sub> H <sub>8</sub> O <sub>7</sub>    | M-H | 192.0270 | 191.0197 | 191.019  | 3.80 | 0.6 | -                          | 4 |
| Chorismate                                               | C <sub>10</sub> H <sub>10</sub> O <sub>6</sub>  | M-H | 226.0477 | 225.0405 | 225.0397 | 3.38 | 4   | -                          | 4 |
| L-Arogenic acid                                          | C <sub>10</sub> H <sub>13</sub> NO <sub>5</sub> | M-H | 163.0997 | 162.0924 | 162.0922 | 1.46 | 3.9 | -                          | 4 |
| Oxalic acid                                              | C <sub>2</sub> H <sub>2</sub> O <sub>4</sub>    | M-H | 89.9953  | 88.9880  | 88.9877  | 3.73 | 1   | -                          | 4 |
| Gallate                                                  | C <sub>7</sub> H <sub>6</sub> O <sub>5</sub>    | M-H | 170.0215 | 169.0142 | 169.0134 | 5.01 | 0.5 | 125.0245,97.0290,79.0186   | 3 |
| 2-hydroxy-5-[(3,4,5-trihydroxyoxan-2-yl)oxy]benzoic acid | C <sub>12</sub> H <sub>14</sub> O <sub>8</sub>  | M-H | 286.0689 | 285.0616 | 285.0599 | 5.96 | 3.9 | 152.0106,108.0213,109.0291 | 3 |
| Lyoniside                                                | C <sub>27</sub> H <sub>36</sub> O <sub>12</sub> | M-H | 552.2207 | 551.2134 | 551.2095 | 7.07 | 4.3 | 373.1282,404.1492,59.0137  | 3 |
| Gentisic acid                                            | C <sub>7</sub> H <sub>6</sub> O <sub>4</sub>    | M-H | 154.0266 | 153.0193 | 153.0178 | 6.74 | 4.1 | 109.0292,110.0010,137.9956 | 3 |
| Atraric Acid                                             | C <sub>10</sub> H <sub>12</sub> O <sub>4</sub>  | M-H | 196.0736 | 195.0663 | 195.0648 | 7.59 | 5.3 | 151.0765,167.0350,136.0528 | 3 |

**Supplemental Table S8:** Pathway impacts of biochemical pathways in *Doliocarpus dentatus* white ecotype as a result of using the mummichog algorithm used in Pathway analysis module in MetaboAnalyst 5.0

| Pathways                                                  | Total | Expected | Hits | Raw p    | -Log10(p) | Holm adjust | False Discovery Rate | Impact  |  |
|-----------------------------------------------------------|-------|----------|------|----------|-----------|-------------|----------------------|---------|--|
| Flavonoid biosynthesis                                    | 47    | 8.2717   | 23   | 5.22E-07 | 6.2822    | 5.01E-05    | 5.01E-05             | 0.35771 |  |
| Steroid biosynthesis                                      | 45    | 7.9198   | 18   | 0.000271 | 3.5674    | 0.025183    | 0.0064988            | 0.45432 |  |
| Phenylpropanoid biosynthesis                              | 46    | 8.0958   | 14   | 0.021621 | 1.6651    | 1           | 0.13837              | 0.49931 |  |
| Valine, leucine and isoleucine biosynthesis               | 22    | 3.8719   | 13   | 1.30E-05 | 4.8856    | 0.0012362   | 0.0006246            | 0.43383 |  |
| Ubiquinone and other terpenoid-quinone biosynthesis       | 38    | 6.6878   | 13   | 0.009532 | 2.0208    | 0.81971     | 0.083184             | 0.44435 |  |
| Galactose metabolism                                      | 27    | 4.7519   | 11   | 0.003727 | 2.4287    | 0.32795     | 0.039752             | 0.48491 |  |
| alpha-Linolenic acid metabolism                           | 28    | 4.9278   | 11   | 0.005197 | 2.2842    | 0.45218     | 0.049895             | 0.65224 |  |
| Amino sugar and nucleotide sugar metabolism               | 50    | 8.7997   | 11   | 0.25317  | 0.59658   | 1           | 0.90017              | 0.03673 |  |
| Diterpenoid biosynthesis                                  | 28    | 4.9278   | 10   | 0.01618  | 1.791     | 1           | 0.11949              | 0.38809 |  |
| Tyrosine metabolism                                       | 16    | 2.8159   | 9    | 0.000515 | 3.2878    | 0.047421    | 0.0098967            | 0.47297 |  |
| Cutin, suberine and wax biosynthesis                      | 18    | 3.1679   | 9    | 0.001575 | 2.8029    | 0.1417      | 0.021593             | 0.4375  |  |
| Fructose and mannose metabolism                           | 20    | 3.5199   | 8    | 0.014897 | 1.8269    | 1           | 0.11918              | 0.12586 |  |
| Sesquiterpenoid and triterpenoid biosynthesis             | 24    | 4.2239   | 8    | 0.045824 | 1.3389    | 1           | 0.27494              | 0.36175 |  |
| Biosynthesis of unsaturated fatty acids                   | 22    | 3.8719   | 7    | 0.07579  | 1.1204    | 1           | 0.40421              | 0       |  |
| Pantothenate and CoA biosynthesis                         | 23    | 4.0479   | 7    | 0.093272 | 1.0302    | 1           | 0.4477               | 0.2203  |  |
| Brassinosteroid biosynthesis                              | 26    | 4.5759   | 7    | 0.1577   | 0.80217   | 1           | 0.6308               | 0.15239 |  |
| Fatty acid biosynthesis                                   | 56    | 9.8557   | 7    | 0.88905  | 0.051076  | 1           | 1                    | 0.01123 |  |
| Biosynthesis of secondary metabolites - other antibiotics | 6     | 1.056    | 6    | 2.83E-05 | 4.5477    | 0.0026631   | 0.00090658           | 1       |  |
| Flavone and flavonol biosynthesis                         | 10    | 1.7599   | 6    | 0.003146 | 2.5023    | 0.27995     | 0.037745             | 0.85    |  |
| Ascorbate and aldarate metabolism                         | 18    | 3.1679   | 6    | 0.080095 | 1.0964    | 1           | 0.40469              | 0.26865 |  |
| Citrate cycle (TCA cycle)                                 | 20    | 3.5199   | 6    | 0.12342  | 0.9086    | 1           | 0.53858              | 0.18262 |  |
| Glyoxylate and dicarboxylate metabolism                   | 29    | 5.1038   | 6    | 0.40343  | 0.39424   | 1           | 1                    | 0.30723 |  |
| Glycine, serine and threonine metabolism                  | 33    | 5.8078   | 6    | 0.53731  | 0.26977   | 1           | 1                    | 0.10432 |  |



|                                                       |    |         |   |          |           |          |          |         |  |
|-------------------------------------------------------|----|---------|---|----------|-----------|----------|----------|---------|--|
| Carotenoid biosynthesis                               | 43 | 7.5678  | 6 | 0.79613  | 0.099017  | 1        | 1        | 0.0365  |  |
| Purine metabolism                                     | 63 | 11.088  | 6 | 0.97766  | 0.0098126 | 1        | 1        | 0.1955  |  |
| C5-Branched dibasic acid metabolism                   | 6  | 1.056   | 5 | 0.00084  | 3.0759    | 0.076416 | 0.013436 | 1       |  |
| Butanoate metabolism                                  | 17 | 2.9919  | 5 | 0.16454  | 0.78373   | 1        | 0.63183  | 0       |  |
| Phenylalanine, tyrosine and tryptophan biosynthesis   | 22 | 3.8719  | 5 | 0.34249  | 0.46535   | 1        | 1        | 0.21672 |  |
| Starch and sucrose metabolism                         | 22 | 3.8719  | 5 | 0.34249  | 0.46535   | 1        | 1        | 0.51292 |  |
| Aminoacyl-tRNA biosynthesis                           | 46 | 8.0958  | 5 | 0.92905  | 0.031959  | 1        | 1        | 0.05556 |  |
| Glucosinolate biosynthesis                            | 65 | 11.44   | 5 | 0.99418  | 0.002536  | 1        | 1        | 0       |  |
| Phenylalanine metabolism                              | 11 | 1.9359  | 4 | 0.1114   | 0.9531    | 1        | 0.50927  | 0.23529 |  |
| Alanine, aspartate and glutamate metabolism           | 22 | 3.8719  | 4 | 0.55939  | 0.25228   | 1        | 1        | 0.07554 |  |
| Pyruvate metabolism                                   | 22 | 3.8719  | 4 | 0.55939  | 0.25228   | 1        | 1        | 0.24039 |  |
| Tryptophan metabolism                                 | 28 | 4.9278  | 4 | 0.75405  | 0.1226    | 1        | 1        | 0.2037  |  |
| Cyanoamino acid metabolism                            | 29 | 5.1038  | 4 | 0.77905  | 0.10844   | 1        | 1        | 0.23729 |  |
| Terpenoid backbone biosynthesis                       | 30 | 5.2798  | 4 | 0.802    | 0.095826  | 1        | 1        | 0.14525 |  |
| Valine, leucine and isoleucine degradation            | 37 | 6.5118  | 4 | 0.9136   | 0.039246  | 1        | 1        | 0.00991 |  |
| Cysteine and methionine metabolism                    | 46 | 8.0958  | 4 | 0.97377  | 0.011545  | 1        | 1        | 0.08428 |  |
| Linoleic acid metabolism                              | 4  | 0.70398 | 3 | 0.018775 | 1.7264    | 1        | 0.12874  | 1       |  |
| Isoquinoline alkaloid biosynthesis                    | 6  | 1.056   | 3 | 0.071241 | 1.1473    | 1        | 0.4023   | 0       |  |
| Stilbenoid, diarylheptanoid and gingerol biosynthesis | 8  | 1.408   | 3 | 0.15231  | 0.81729   | 1        | 0.6308   | 0.39705 |  |
| Arachidonic acid metabolism                           | 12 | 2.1119  | 3 | 0.35578  | 0.44881   | 1        | 1        | 0       |  |
| Pentose and glucuronate interconversions              | 16 | 2.8159  | 3 | 0.55408  | 0.25643   | 1        | 1        | 0.15625 |  |
| Arginine biosynthesis                                 | 18 | 3.1679  | 3 | 0.63873  | 0.19468   | 1        | 1        | 0.12816 |  |
| beta-Alanine metabolism                               | 18 | 3.1679  | 3 | 0.63873  | 0.19468   | 1        | 1        | 0.31746 |  |
| Glycerolipid metabolism                               | 21 | 3.6959  | 3 | 0.74343  | 0.12876   | 1        | 1        | 0.00426 |  |
| Zeatin biosynthesis                                   | 21 | 3.6959  | 3 | 0.74343  | 0.12876   | 1        | 1        | 0.01491 |  |
| Thiamine metabolism                                   | 22 | 3.8719  | 3 | 0.77249  | 0.11211   | 1        | 1        | 0.20231 |  |
| Glycolysis / Gluconeogenesis                          | 26 | 4.5759  | 3 | 0.86292  | 0.06403   | 1        | 1        | 0.1215  |  |
| Inositol phosphate metabolism                         | 28 | 4.9278  | 3 | 0.89502  | 0.048167  | 1        | 1        | 0.10251 |  |
| Limonene and pinene degradation                       | 5  | 0.87997 | 2 | 0.21423  | 0.66911   | 1        | 0.79102  | 0       |  |
| Monobactam biosynthesis                               | 8  | 1.408   | 2 | 0.42454  | 0.37208   | 1        | 1        | 0       |  |
| One carbon pool by folate                             | 8  | 1.408   | 2 | 0.42454  | 0.37208   | 1        | 1        | 0       |  |
| Monoterpenoid biosynthesis                            | 9  | 1.584   | 2 | 0.48866  | 0.31099   | 1        | 1        | 0       |  |

|                                                        |    |         |   |         |            |   |   |         |  |
|--------------------------------------------------------|----|---------|---|---------|------------|---|---|---------|--|
| Caffeine metabolism                                    | 10 | 1.7599  | 2 | 0.54813 | 0.26112    | 1 | 1 | 0       |  |
| Selenocompound metabolism                              | 13 | 2.2879  | 2 | 0.69631 | 0.1572     | 1 | 1 | 0.2437  |  |
| Sphingolipid metabolism                                | 17 | 2.9919  | 2 | 0.82924 | 0.081322   | 1 | 1 | 0.24038 |  |
| Pentose phosphate pathway                              | 19 | 3.3439  | 2 | 0.87381 | 0.058585   | 1 | 1 | 0       |  |
| Carbon fixation in photosynthetic organisms            | 21 | 3.6959  | 2 | 0.90746 | 0.042172   | 1 | 1 | 0.03607 |  |
| Glycerophospholipid metabolism                         | 37 | 6.5118  | 2 | 0.99357 | 0.0028005  | 1 | 1 | 0.06318 |  |
| Betalain biosynthesis                                  | 3  | 0.52798 | 1 | 0.44075 | 0.3558     | 1 | 1 | 1       |  |
| Tropane, piperidine and pyridine alkaloid biosynthesis | 8  | 1.408   | 1 | 0.78832 | 0.1033     | 1 | 1 | 0       |  |
| Lysine biosynthesis                                    | 9  | 1.584   | 1 | 0.82578 | 0.083138   | 1 | 1 | 0.2027  |  |
| Vitamin B6 metabolism                                  | 11 | 1.9359  | 1 | 0.88203 | 0.054517   | 1 | 1 | 0.03205 |  |
| Riboflavin metabolism                                  | 11 | 1.9359  | 1 | 0.88203 | 0.054517   | 1 | 1 | 0.06667 |  |
| Nicotinate and nicotinamide metabolism                 | 13 | 2.2879  | 1 | 0.92017 | 0.036133   | 1 | 1 | 0       |  |
| Lysine degradation                                     | 18 | 3.1679  | 1 | 0.97    | 0.013227   | 1 | 1 | 0       |  |
| Propanoate metabolism                                  | 20 | 3.5199  | 1 | 0.97974 | 0.0088884  | 1 | 1 | 0.08554 |  |
| Fatty acid elongation                                  | 23 | 4.0479  | 1 | 0.98877 | 0.0049048  | 1 | 1 | 0       |  |
| Glutathione metabolism                                 | 26 | 4.5759  | 1 | 0.99378 | 0.0027085  | 1 | 1 | 0       |  |
| Phosphatidylinositol signaling system                  | 26 | 4.5759  | 1 | 0.99378 | 0.0027085  | 1 | 1 | 0.03285 |  |
| Folate biosynthesis                                    | 27 | 4.7519  | 1 | 0.9949  | 0.0022221  | 1 | 1 | 0.02624 |  |
| Arginine and proline metabolism                        | 34 | 5.9838  | 1 | 0.99872 | 0.00055462 | 1 | 1 | 0.0122  |  |
| Fatty acid degradation                                 | 37 | 6.5118  | 1 | 0.9993  | 0.00030544 | 1 | 1 | 0       |  |
| Pyrimidine metabolism                                  | 38 | 6.6878  | 1 | 0.99942 | 0.00025029 | 1 | 1 | 0       |  |
| Porphyrin and chlorophyll metabolism                   | 48 | 8.4477  | 1 | 0.99992 | 3.39E-05   | 1 | 1 | 0.07537 |  |

**Supplemental Table S9:** Biochemical pathway impacts observed in *Doliocarpus dentatus* red ecotype as a result of using the mummichog algorithm used in Pathway analysis module in MetaboAnalyst 5.0

| Pathways                                                  | Total | Expected | Hits | Raw p      |         | Holm adjust | False Discovery Rate | Impact  |  |
|-----------------------------------------------------------|-------|----------|------|------------|---------|-------------|----------------------|---------|--|
| Sesquiterpenoid and triterpenoid biosynthesis             | 24    | 5.648    | 19   | 1.00E-08   | 7.9991  | 9.62E-07    | 9.62E-07             | 0.57797 |  |
| Galactose metabolism                                      | 27    | 6.354    | 20   | 2.91E-08   | 7.5357  | 2.77E-06    | 1.40E-06             | 0.82797 |  |
| Flavonoid biosynthesis                                    | 47    | 11.061   | 25   | 7.37E-06   | 5.1325  | 0.00069283  | 0.000236             | 0.4785  |  |
| Ascorbate and aldarate metabolism                         | 18    | 4.236    | 12   | 0.00011168 | 3.952   | 0.010386    | 0.00268              | 0.64179 |  |
| Biosynthesis of secondary metabolites - other antibiotics | 6     | 1.412    | 6    | 0.00016434 | 3.7843  | 0.015119    | 0.003155             | 1       |  |
| Steroid biosynthesis                                      | 45    | 10.59    | 21   | 0.0004642  | 3.3333  | 0.042243    | 0.006488             | 0.62018 |  |
| Fructose and mannose metabolism                           | 20    | 4.7067   | 12   | 0.00047307 | 3.3251  | 0.042576    | 0.006488             | 0.65819 |  |
| Flavone and flavonol biosynthesis                         | 10    | 2.3533   | 7    | 0.002327   | 2.6332  | 0.2071      | 0.027924             | 0.65    |  |
| Ubiquinone and other terpenoid-quinone biosynthesis       | 38    | 8.9427   | 17   | 0.0028877  | 2.5395  | 0.25411     | 0.030692             | 0.55568 |  |
| Cutin, suberine and wax biosynthesis                      | 18    | 4.236    | 10   | 0.0031971  | 2.4952  | 0.27815     | 0.030692             | 0.75    |  |
| Valine, leucine and isoleucine biosynthesis               | 22    | 5.1773   | 11   | 0.0058125  | 2.2356  | 0.49987     | 0.0465               | 0.53039 |  |
| Starch and sucrose metabolism                             | 22    | 5.1773   | 11   | 0.0058125  | 2.2356  | 0.49987     | 0.0465               | 0.74456 |  |
| alpha-Linolenic acid metabolism                           | 28    | 6.5893   | 12   | 0.017648   | 1.7533  | 1           | 0.13032              | 0.60278 |  |
| Riboflavin metabolism                                     | 11    | 2.5887   | 6    | 0.02533    | 1.5964  | 1           | 0.17369              | 0.75557 |  |
| Citrate cycle (TCA cycle)                                 | 20    | 4.7067   | 9    | 0.027489   | 1.5608  | 1           | 0.17593              | 0.39412 |  |
| C5-Branched dibasic acid metabolism                       | 6     | 1.412    | 4    | 0.030102   | 1.5214  | 1           | 0.18061              | 0.5     |  |
| Linoleic acid metabolism                                  | 4     | 0.94134  | 3    | 0.04271    | 1.3695  | 1           | 0.23746              | 1       |  |
| Diterpenoid biosynthesis                                  | 28    | 6.5893   | 11   | 0.044525   | 1.3514  | 1           | 0.23746              | 0.38321 |  |
| Amino sugar and nucleotide sugar metabolism               | 50    | 11.767   | 17   | 0.058165   | 1.2353  | 1           | 0.28261              | 0.43695 |  |
| Tyrosine metabolism                                       | 16    | 3.7653   | 7    | 0.058878   | 1.2301  | 1           | 0.28261              | 0.27027 |  |
| Butanoate metabolism                                      | 17    | 4.0007   | 7    | 0.080576   | 1.0938  | 1           | 0.36835              | 0.22727 |  |
| Glyoxylate and dicarboxylate metabolism                   | 29    | 6.8247   | 10   | 0.12049    | 0.91905 | 1           | 0.50883              | 0.40321 |  |
| Alanine, aspartate and glutamate metabolism               | 22    | 5.1773   | 8    | 0.12191    | 0.91397 | 1           | 0.50883              | 0.46044 |  |
| Arachidonic acid metabolism                               | 12    | 2.824    | 5    | 0.12798    | 0.89284 | 1           | 0.51194              | 0       |  |
| Pentose phosphate pathway                                 | 19    | 4.4713   | 7    | 0.13585    | 0.86694 | 1           | 0.52167              | 0.36819 |  |
| Pantothenate and CoA biosynthesis                         | 23    | 5.4127   | 8    | 0.15051    | 0.82244 | 1           | 0.55572              | 0.24838 |  |
| Caffeine metabolism                                       | 10    | 2.3533   | 4    | 0.19027    | 0.72064 | 1           | 0.6765               | 0       |  |
| Biosynthesis of unsaturated fatty acids                   | 22    | 5.1773   | 7    | 0.24409    | 0.61245 | 1           | 0.83547              | 0       |  |
| Glycolysis / Gluconeogenesis                              | 26    | 6.1187   | 8    | 0.25238    | 0.59794 | 1           | 0.83547              | 0.24829 |  |

|                                                        |    |         |    |         |          |   |         |         |  |
|--------------------------------------------------------|----|---------|----|---------|----------|---|---------|---------|--|
| Phenylpropanoid biosynthesis                           | 46 | 10.825  | 13 | 0.27097 | 0.56708  | 1 | 0.8671  | 0.44832 |  |
| Pentose and glucuronate interconversions               | 16 | 3.7653  | 5  | 0.31708 | 0.49883  | 1 | 0.98193 | 0.25    |  |
| Thiamine metabolism                                    | 22 | 5.1773  | 6  | 0.41848 | 0.37833  | 1 | 1       | 0.47399 |  |
| Phenylalanine metabolism                               | 11 | 2.5887  | 3  | 0.49894 | 0.30195  | 1 | 1       | 0.23529 |  |
| Inositol phosphate metabolism                          | 28 | 6.5893  | 7  | 0.50041 | 0.30068  | 1 | 1       | 0.14853 |  |
| Phosphonate and phosphinate metabolism                 | 7  | 1.6473  | 2  | 0.51818 | 0.28552  | 1 | 1       | 0       |  |
| Valine, leucine and isoleucine degradation             | 37 | 8.7073  | 9  | 0.51908 | 0.28476  | 1 | 1       | 0.05889 |  |
| Propanoate metabolism                                  | 20 | 4.7067  | 5  | 0.52492 | 0.27991  | 1 | 1       | 0.22404 |  |
| Cyanoamino acid metabolism                             | 29 | 6.8247  | 7  | 0.54196 | 0.26604  | 1 | 1       | 0.20339 |  |
| Zeatin biosynthesis                                    | 21 | 4.942   | 5  | 0.57305 | 0.24181  | 1 | 1       | 0.02847 |  |
| Carbon fixation in photosynthetic organisms            | 21 | 4.942   | 5  | 0.57305 | 0.24181  | 1 | 1       | 0.16543 |  |
| Sphingolipid metabolism                                | 17 | 4.0007  | 4  | 0.5942  | 0.22607  | 1 | 1       | 0.40865 |  |
| Monobactam biosynthesis                                | 8  | 1.8827  | 2  | 0.5959  | 0.22483  | 1 | 1       | 0       |  |
| One carbon pool by folate                              | 8  | 1.8827  | 2  | 0.5959  | 0.22483  | 1 | 1       | 0       |  |
| Brassinosteroid biosynthesis                           | 26 | 6.1187  | 6  | 0.59863 | 0.22284  | 1 | 1       | 0.11429 |  |
| Pyruvate metabolism                                    | 22 | 5.1773  | 5  | 0.61851 | 0.20865  | 1 | 1       | 0.40463 |  |
| beta-Alanine metabolism                                | 18 | 4.236   | 4  | 0.64322 | 0.19164  | 1 | 1       | 0.38889 |  |
| Synthesis and degradation of ketone bodies             | 4  | 0.94134 | 1  | 0.65854 | 0.18142  | 1 | 1       | 0       |  |
| Indole alkaloid biosynthesis                           | 4  | 0.94134 | 1  | 0.65854 | 0.18142  | 1 | 1       | 0.5     |  |
| Monoterpenoid biosynthesis                             | 9  | 2.118   | 2  | 0.66382 | 0.17795  | 1 | 1       | 0       |  |
| Lysine biosynthesis                                    | 9  | 2.118   | 2  | 0.66382 | 0.17795  | 1 | 1       | 0.29729 |  |
| Glycine, serine and threonine metabolism               | 33 | 7.766   | 7  | 0.69076 | 0.16067  | 1 | 1       | 0.10432 |  |
| Limonene and pinene degradation                        | 5  | 1.1767  | 1  | 0.73911 | 0.13129  | 1 | 1       | 0       |  |
| Glycerolipid metabolism                                | 21 | 4.942   | 4  | 0.7657  | 0.11594  | 1 | 1       | 0.00426 |  |
| Anthocyanin biosynthesis                               | 11 | 2.5887  | 2  | 0.77187 | 0.11246  | 1 | 1       | 0       |  |
| Vitamin B6 metabolism                                  | 11 | 2.5887  | 2  | 0.77187 | 0.11246  | 1 | 1       | 0.03205 |  |
| Phenylalanine, tyrosine and tryptophan biosynthesis    | 22 | 5.1773  | 4  | 0.79841 | 0.097775 | 1 | 1       | 0.28178 |  |
| Isoquinoline alkaloid biosynthesis                     | 6  | 1.412   | 1  | 0.80071 | 0.096522 | 1 | 1       | 0       |  |
| Arginine biosynthesis                                  | 18 | 4.236   | 3  | 0.83362 | 0.079031 | 1 | 1       | 0.2136  |  |
| Nicotinate and nicotinamide metabolism                 | 13 | 3.0593  | 2  | 0.84836 | 0.071418 | 1 | 1       | 0.30707 |  |
| Tropane, piperidine and pyridine alkaloid biosynthesis | 8  | 1.8827  | 1  | 0.88379 | 0.053651 | 1 | 1       | 0       |  |
| Stilbenoid, diarylheptanoid and gingerol biosynthesis  | 8  | 1.8827  | 1  | 0.88379 | 0.053651 | 1 | 1       | 0.13235 |  |
| Phosphatidylinositol signaling system                  | 26 | 6.1187  | 4  | 0.89415 | 0.048589 | 1 | 1       | 0.03545 |  |

|                                      |    |        |   |         |            |   |   |         |  |
|--------------------------------------|----|--------|---|---------|------------|---|---|---------|--|
| Sulfur metabolism                    | 15 | 3.53   | 2 | 0.90082 | 0.045364   | 1 | 1 | 0.10774 |  |
| Carotenoid biosynthesis              | 43 | 10.119 | 7 | 0.91147 | 0.040259   | 1 | 1 | 0.07053 |  |
| Tryptophan metabolism                | 28 | 6.5893 | 4 | 0.92499 | 0.033863   | 1 | 1 | 0.1713  |  |
| Terpenoid backbone biosynthesis      | 30 | 7.06   | 4 | 0.94751 | 0.023414   | 1 | 1 | 0.17239 |  |
| Nitrogen metabolism                  | 12 | 2.824  | 1 | 0.96058 | 0.017465   | 1 | 1 | 0       |  |
| Selenocompound metabolism            | 13 | 3.0593 | 1 | 0.96994 | 0.013257   | 1 | 1 | 0       |  |
| Fatty acid biosynthesis              | 56 | 13.179 | 8 | 0.97158 | 0.01252    | 1 | 1 | 0.01123 |  |
| Aminoacyl-tRNA biosynthesis          | 46 | 10.825 | 6 | 0.97634 | 0.010401   | 1 | 1 | 0.05556 |  |
| Cysteine and methionine metabolism   | 46 | 10.825 | 6 | 0.97634 | 0.010401   | 1 | 1 | 0.17084 |  |
| Purine metabolism                    | 63 | 14.826 | 9 | 0.97762 | 0.009828   | 1 | 1 | 0.11117 |  |
| Histidine metabolism                 | 15 | 3.53   | 1 | 0.98252 | 0.0076586  | 1 | 1 | 0.13953 |  |
| Glutathione metabolism               | 26 | 6.1187 | 2 | 0.99199 | 0.0034919  | 1 | 1 | 0.05046 |  |
| Lysine degradation                   | 18 | 4.236  | 1 | 0.99226 | 0.0033732  | 1 | 1 | 0       |  |
| Arginine and proline metabolism      | 34 | 8.0013 | 3 | 0.99341 | 0.0028701  | 1 | 1 | 0.09001 |  |
| Glucosinolate biosynthesis           | 65 | 15.297 | 8 | 0.99344 | 0.002859   | 1 | 1 | 0.00154 |  |
| Folate biosynthesis                  | 27 | 6.354  | 2 | 0.9937  | 0.0027463  | 1 | 1 | 0       |  |
| Pyrimidine metabolism                | 38 | 8.9427 | 3 | 0.9973  | 0.0011744  | 1 | 1 | 0.13096 |  |
| Fatty acid elongation                | 23 | 5.4127 | 1 | 0.99802 | 0.00086099 | 1 | 1 | 0       |  |
| N-Glycan biosynthesis                | 35 | 8.2367 | 2 | 0.99911 | 0.00038711 | 1 | 1 | 0.07466 |  |
| Porphyrin and chlorophyll metabolism | 48 | 11.296 | 3 | 0.99973 | 0.00011525 | 1 | 1 | 0.09842 |  |
| Fatty acid degradation               | 37 | 8.7073 | 1 | 0.99996 | 1.84E-05   | 1 | 1 | 0       |  |
| Glycerophospholipid metabolism       | 37 | 8.7073 | 1 | 0.99996 | 1.84E-05   | 1 | 1 | 0.02629 |  |

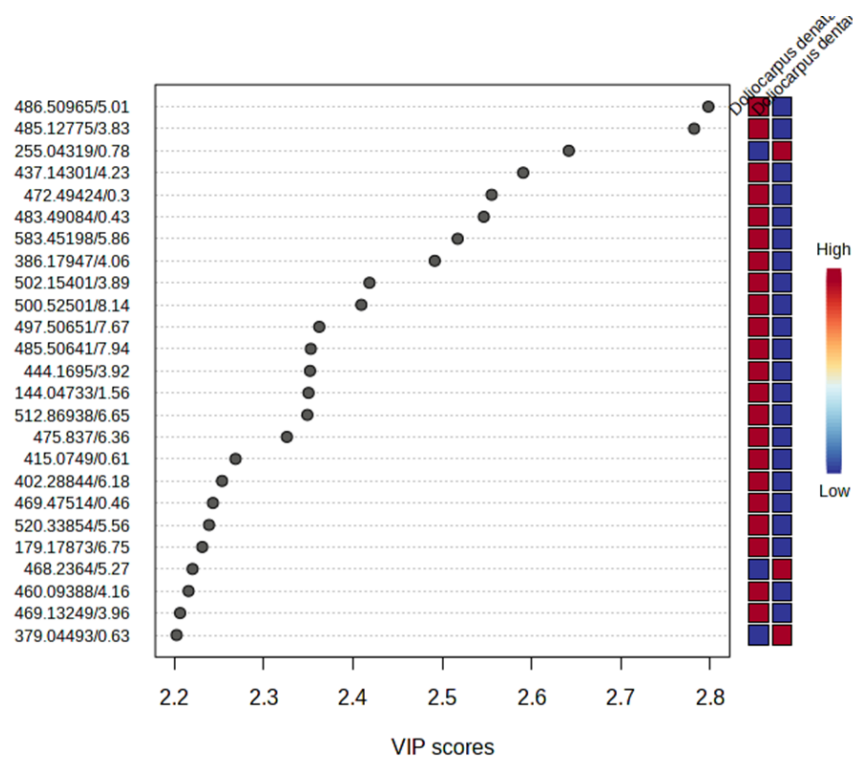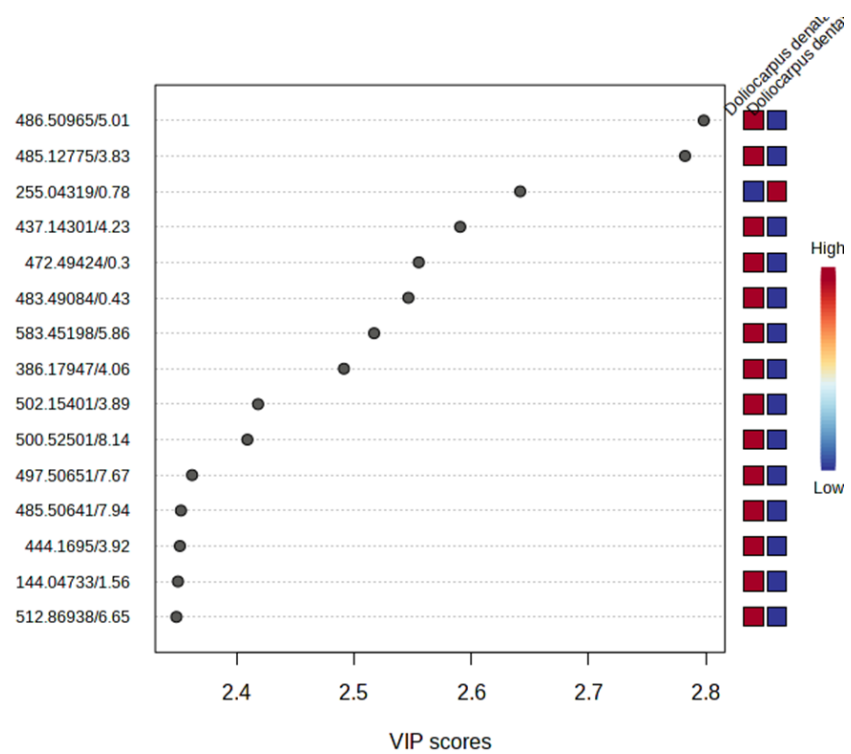

**Supplemental Figure S1:** (B) VIP scores for PLS-DA showing features responsible for divergence from PCA analysis. (A) represents data in positive ionization mode and (B) negative ionization mode.

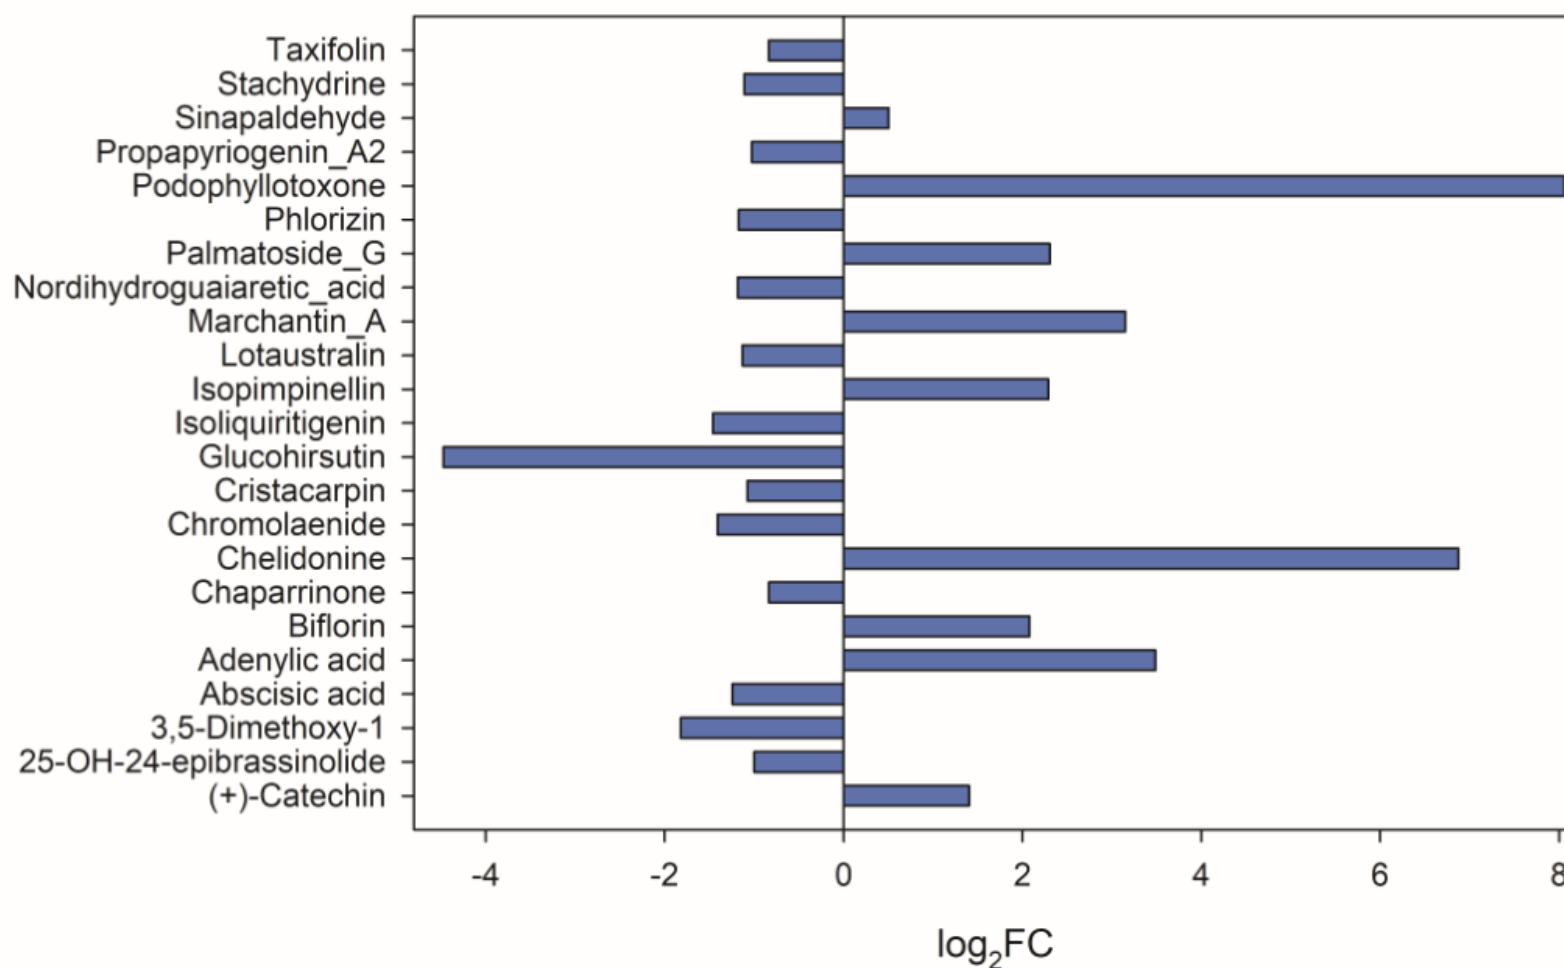

**Supplemental Figure S2:** Bar chart showing up-or-downregulated select putative compounds at level 4 metabolite annotation. Metabolite annotation was done via MetaboAnalyst 5.0, MetaboQuest and linked to KEGG. Xcalibur Software (v.4.1) was used to confirm masses and peak quality in sample replicates.

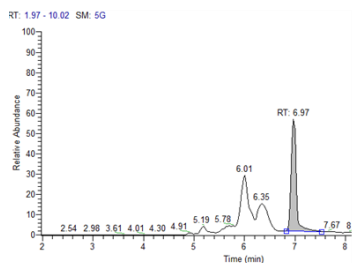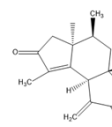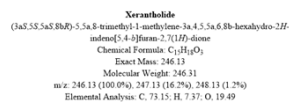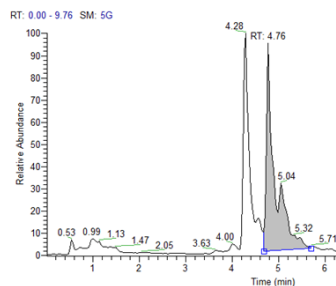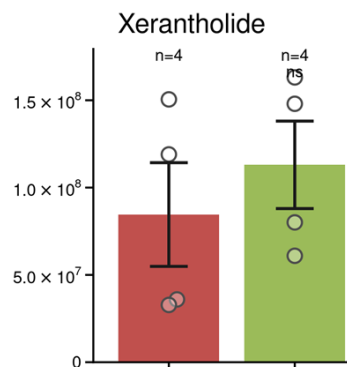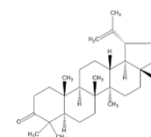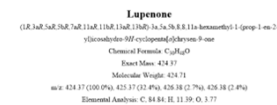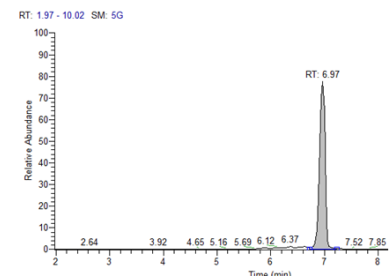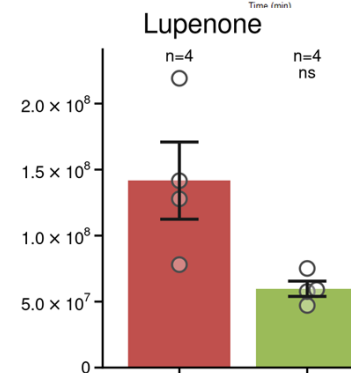

**Supplemental Figure S3:** Select terpenoid biomarkers showing molecular structure and formulae, chromatogram peak region found, and integrated peak areas. For integrated peak areas, red and green denote red and white Capadulla respectively.



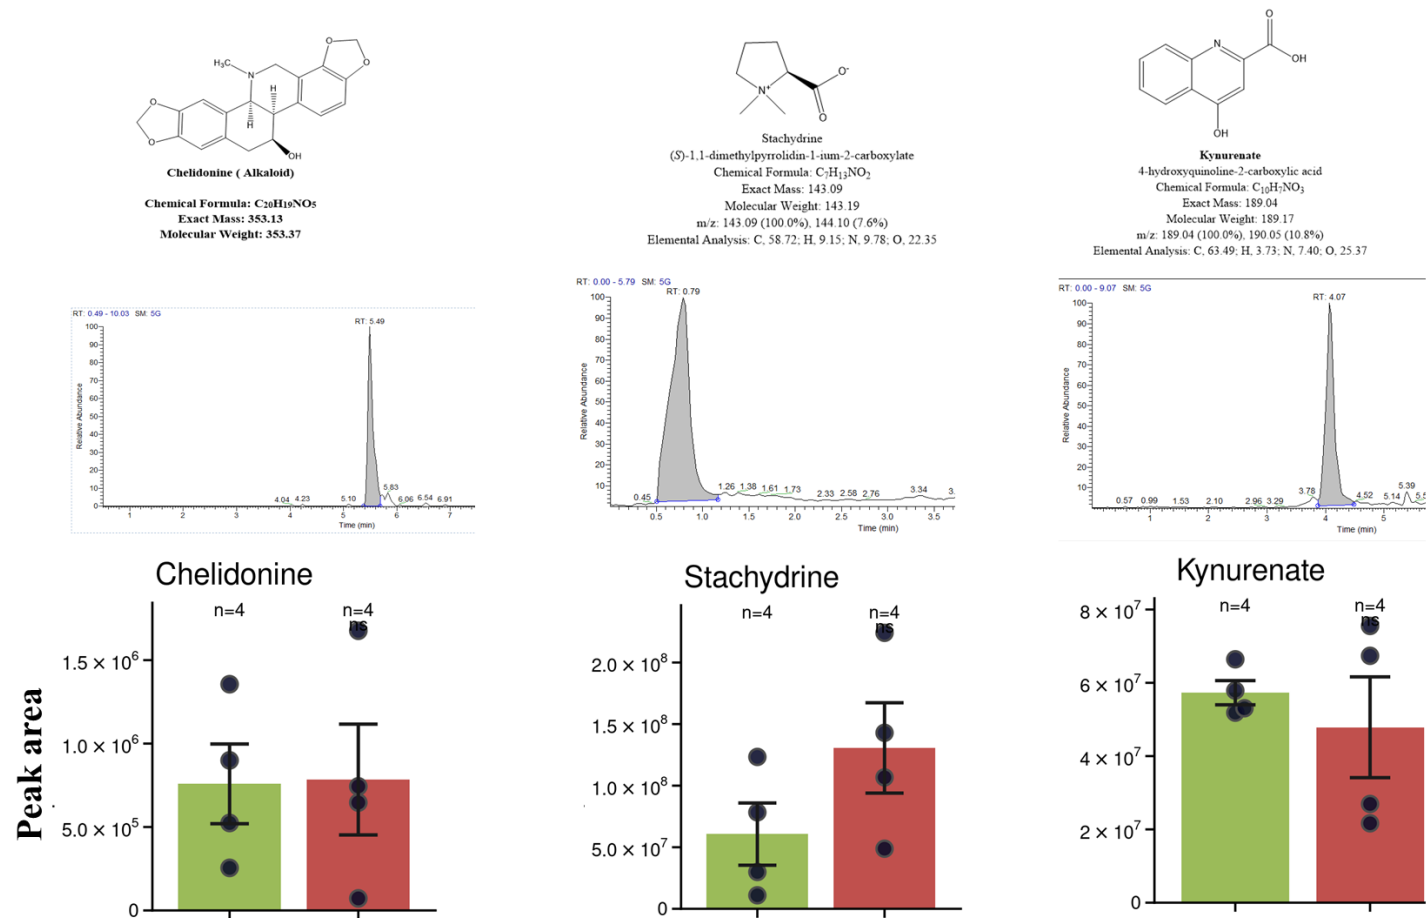

**Supplemental Figure S4:** Select alkaloid biomarkers showing molecular structure and formulae, chromatogram peak region found, and integrated peak areas. For integrated peak areas, red and green denote red and white Capadulla respectively.

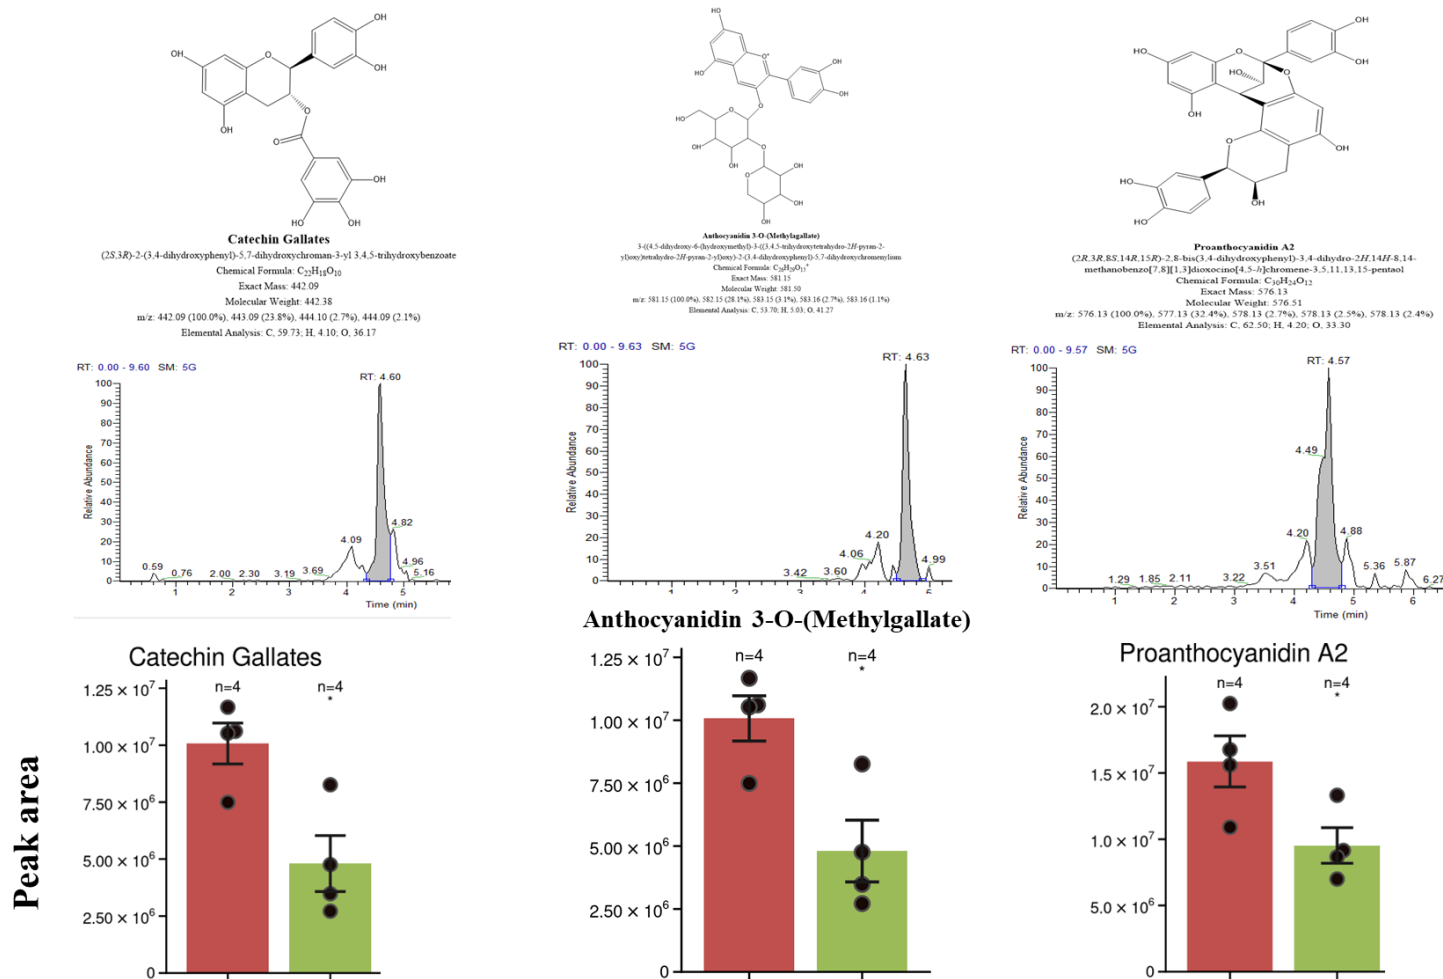

**Supplemental Figure S5:** Select phenolic biomarkers showing molecular structure and formulae, chromatogram peak region found, and integrated peak areas. For integrated peak areas, red and green denote red and white Capadulla respectively.

[A]

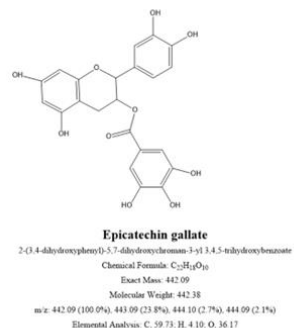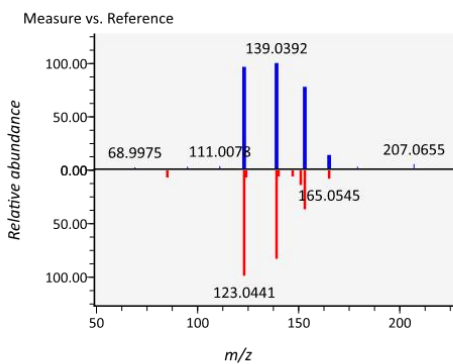

[B]

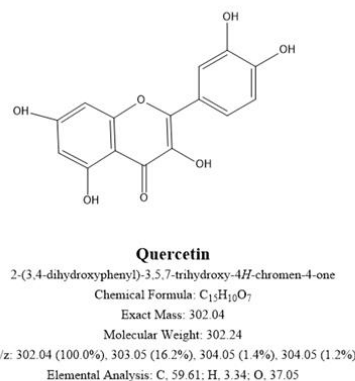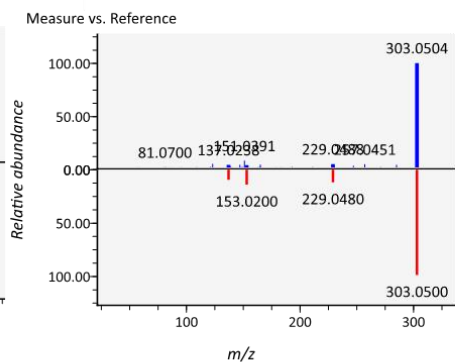

[C]

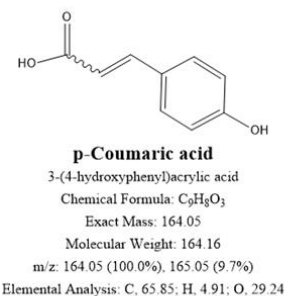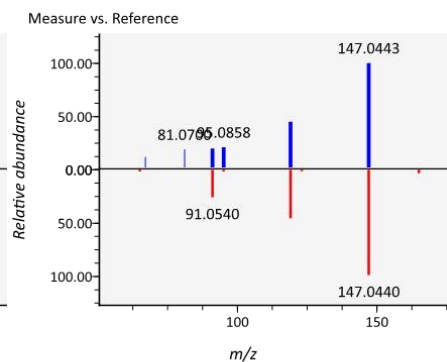

[D]

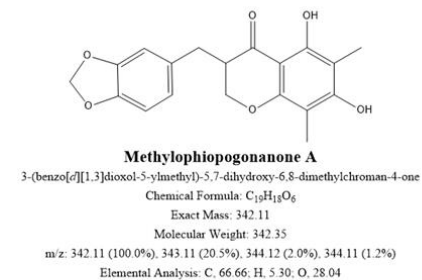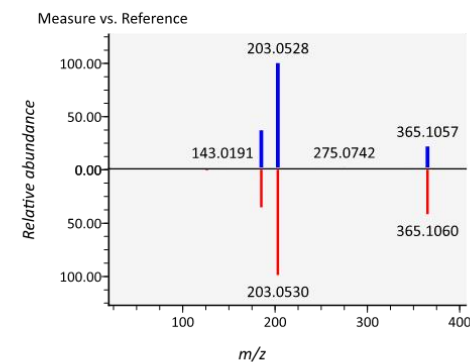

**Supplemental Figure S6A:** Select level 2 tentative identification of flavonoid compounds in positive ionization mode using MS-DIAL 5.1.

[E]

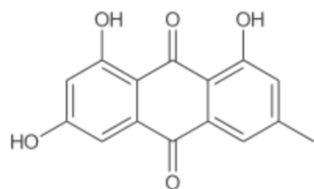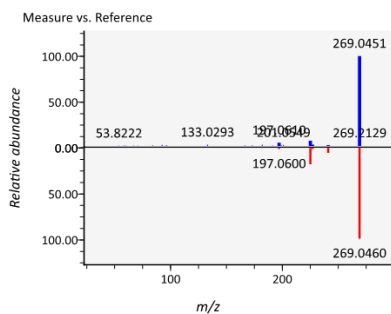

Emodin

[F]

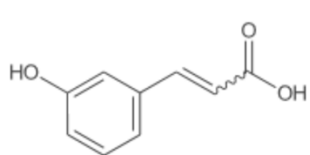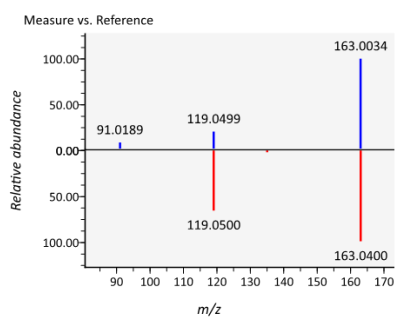

3-Coumaric acid

[G]

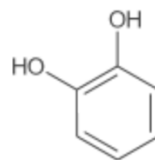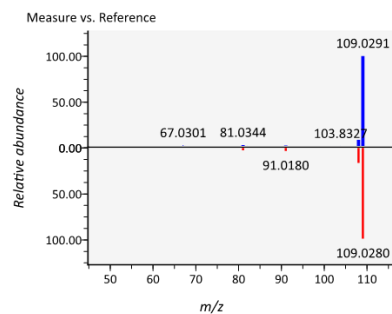

Catechol

[H]

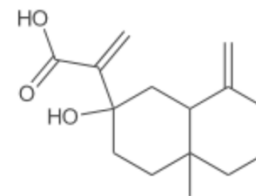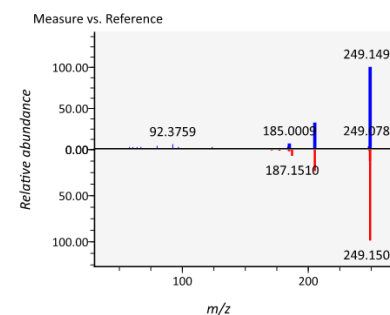

2-[(2S,4aR,8aS)-2-hydroxy-4a-methyl-8-methylidene-3,4,5,6,7,8a-hexahydro-1H-naphthalen-2-yl]prop-2-enoic acid

**Supplemental Figure S6B:** Select level 2 tentative identification of flavonoid compounds in positive ionization mode using MS-DIAL 5.1.

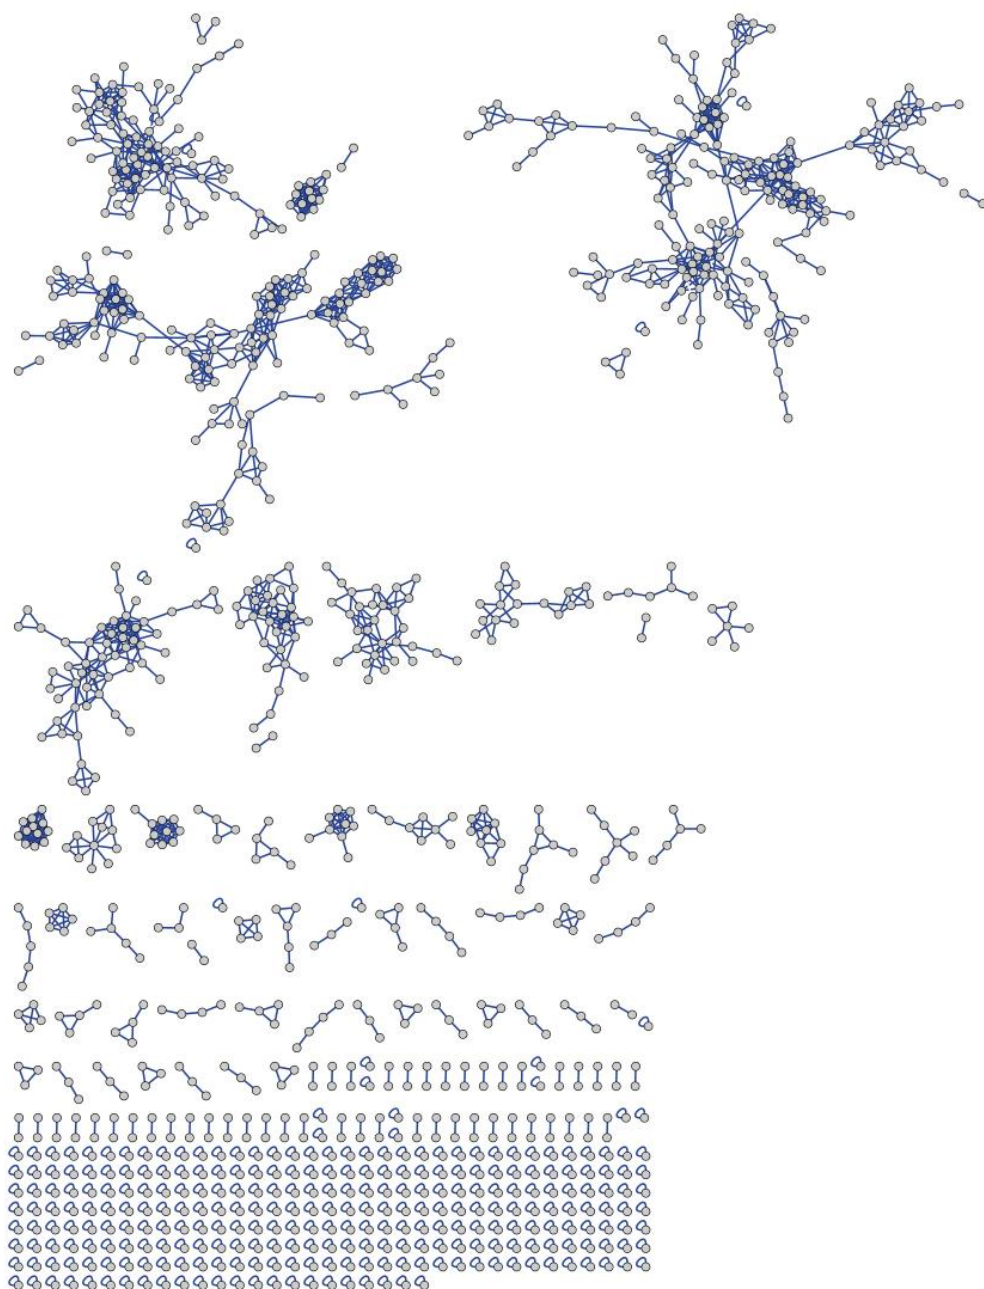

Supplemental Figure S7: Merged polarity network analysis of classical molecular networking for *D. dentatus* ecotypes using positive and negative ionization modes.

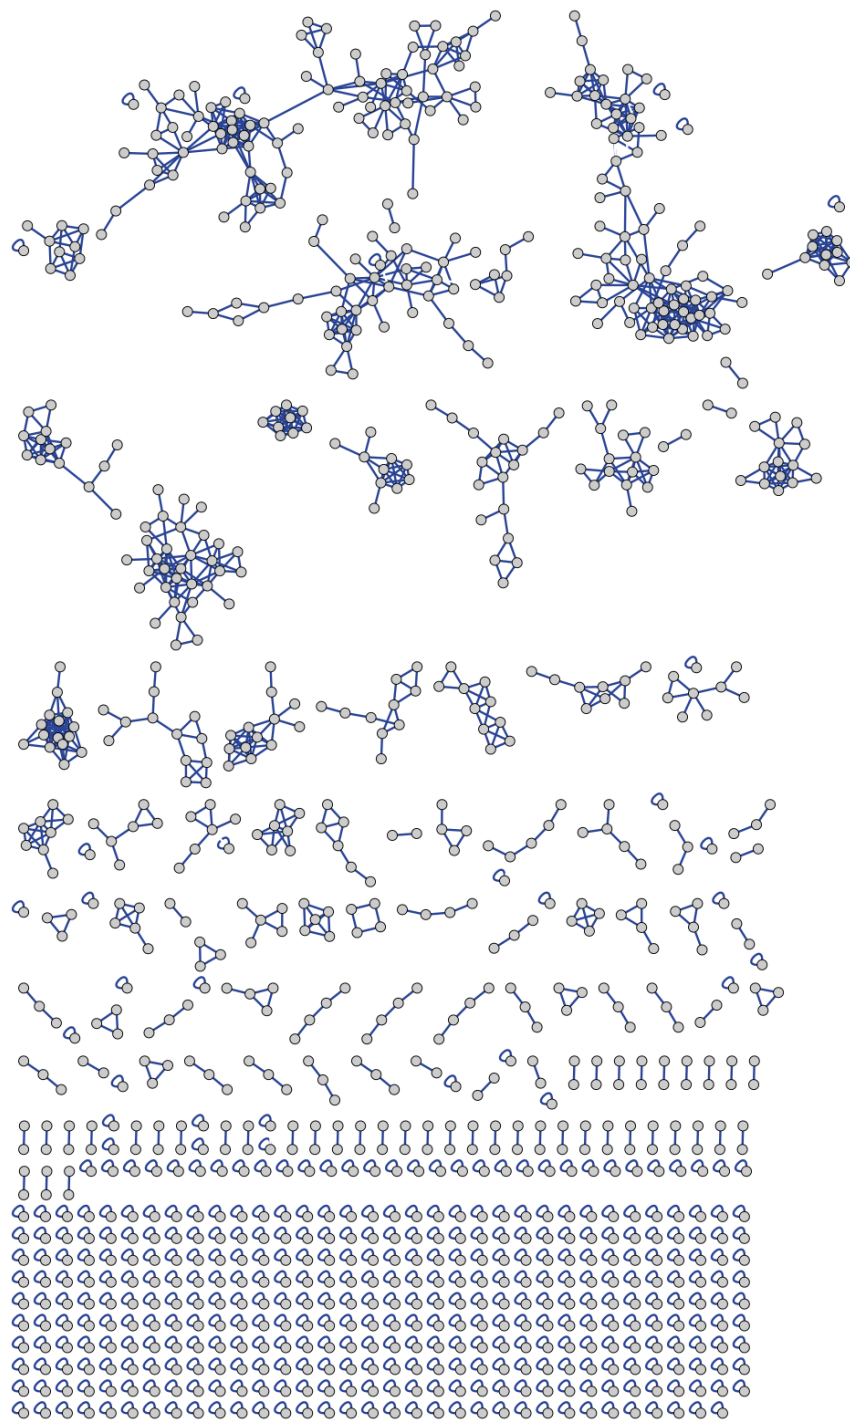

Supplemental Figure S8: Merged polarity network analysis of feature-based molecular networking for *D. dentatus* ecotypes using positive and negative ionization modes.
